# Supplementary material
Source: PubMed Central journal article supplement (PMC3405686)
Supplement: psb-7-235-s01.pdf [file psb-7-235-s01.pdf]

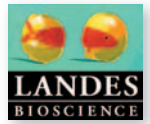

## **Supplemental Material to:**

**Suchi Srivastava, Vasvi Chaudhry, Aradhana Mishra,  
Puneet Singh Chauhan, Ateequr Rehman, Archana Yadav,  
Narendra Tuteja and Chandra S. Nautiyal**

**Gene expression profiling through microarray analysis in  
Arabidopsis thaliana colonized by Pseudomonas putida  
MTCC5279, a plant growth promoting rhizobacterium**

**Plant Signaling & Behavior 2012; 7(2)**

**<http://dx.doi.org/10.4161/psb.18957>**

**<http://www.landesbioscience.com/journals/psb/article/18957/>**

| Custom ID            | Gene Symbol | Gene_ID                 | Accession   | Fold change |
|----------------------|-------------|-------------------------|-------------|-------------|
| obsarabidopsis#00031 | AT4G00231   | 826583                  | NM_116241.3 | 3.31340003  |
| obsarabidopsis#00039 | AT2G23940   | 816926                  | NM_127956.1 | 3.70419997  |
| obsarabidopsis#00055 | LIL3:1      | 827479                  | NM_117868.3 | 4.695500255 |
| obsarabidopsis#00064 | AT4G39750   | ---                     | NM_120136.1 | 3.60319984  |
| obsarabidopsis#00070 | AT4G00290   | ---                     | NM_116243.1 | 3.608199984 |
| obsarabidopsis#00074 | GRF6        | 830909                  | NM_121083.2 | 3.684800088 |
| obsarabidopsis#00090 | BCCP2       | 831406                  | NM_121557.2 | 4.410200059 |
| obsarabidopsis#00091 | AT3G25810   | 822173                  | NM_113482.3 | 3.11939998  |
| obsarabidopsis#00202 | SMO1-3      | 828373                  | NM_118403.1 | 3.257999986 |
| obsarabidopsis#00223 | AIR3        | 814953                  | NM_126453.2 | 3.534399927 |
| obsarabidopsis#00227 | LHY         | 839341                  | NM_099988.3 | 4.213599972 |
| obsarabidopsis#00236 | AT1G01260   | 839545                  | NM_100009.2 | 7.655500054 |
| obsarabidopsis#00257 | AT1G01780   | 839267                  | NM_100061.2 | 5.057500124 |
| obsarabidopsis#00275 |             | ---                     | AC022521.4  | 3.468300045 |
| obsarabidopsis#00302 | UVH6        | 839557                  | NM_100201.2 | 4.609899767 |
| obsarabidopsis#00355 | AT1G05020   | 839343                  | NM_100381.2 | 3.614800036 |
| obsarabidopsis#00356 | AT1G05030   | 839340                  | NM_100382.2 | 5.713000141 |
| obsarabidopsis#00419 | AT1G06730   | 837184                  | NM_100550.2 | 5.324799985 |
| obsarabidopsis#00438 | AT1G07260   | 837237                  | NM_100600.3 | 5.104300022 |
| obsarabidopsis#00533 | AT1G09740   | 837502                  | NM_100846.3 | 3.59229989  |
| obsarabidopsis#00586 | AT1G10980   | 837641                  | NM_100973.1 | 3.722199917 |
| obsarabidopsis#00599 | AT1G11280   | 837670                  | NM_101001.2 | 3.444599956 |
| obsarabidopsis#00618 | AT1G11660   | 837710                  | NM_101038.2 | 3.433100045 |
| obsarabidopsis#00654 | AT1G12750   | 837831                  | NM_101145.2 | 4.24059996  |
| obsarabidopsis#00753 | AVP1        | 838138                  | NM_101437.2 | 4.803599954 |
| obsarabidopsis#00795 | SRG1        | 838272                  | NM_101562.2 | 5.393799871 |
| obsarabidopsis#00855 | AT1G18360   | 838417                  | NM_101694.3 | 3.210500121 |
| obsarabidopsis#00867 | AT1G18690   | 838450                  | NM_101727.1 | 3.112600207 |
| obsarabidopsis#00886 | AT1G19550   | ---                     | NM_101813.1 | 4.273700118 |
| obsarabidopsis#00897 | MP          | 838573                  | NM_101840.2 | 4.552999988 |
| obsarabidopsis#00920 | AT1G20650   | 838654                  | NM_101916.2 | 3.03489998  |
| obsarabidopsis#00960 | AT1G22130   | 838818                  | NM_102063.1 | 3.15839994  |
| obsarabidopsis#00961 | SULTR1      | ---                     | NM_102065.1 | 4.113999963 |
| obsarabidopsis#00967 | AT1G22370   | 838844                  | NM_102087.1 | 3.385599971 |
| obsarabidopsis#00969 | AT1G22480   | 838854                  | NM_102097.3 | 3.675600082 |
| obsarabidopsis#00974 | AT1G22600   | 838866                  | NM_102107.1 | 5.16689992  |
| obsarabidopsis#00979 | AT1G22670   | 838873                  | NM_102114.1 | 3.188599825 |
| obsarabidopsis#00989 | AT1G22900   | 838897                  | NM_102137.2 | 4.352600098 |
| obsarabidopsis#01040 | AT1G24470   | 839063                  | NM_102292.1 | 3.309800088 |
| obsarabidopsis#01143 | ARAB-1      | ---                     | NM_102634.2 | 3.245300174 |
| obsarabidopsis#01158 | PAI3        | 830442///837292///83981 | NM_102681.3 | 5.23360002  |
| obsarabidopsis#01211 | AT1G30760   | 839958                  | NM_102813.2 | 3.437099934 |
| obsarabidopsis#01247 | AT1G31830   | 840073                  | NM_102920.2 | 4.710799873 |

|                      |               |        |             |             |
|----------------------|---------------|--------|-------------|-------------|
| obsarabidopsis#01263 | ATSY24        | 840119 | NM_102960.1 | 3.011600018 |
| obsarabidopsis#01270 | AT1G32450     | 840139 | NM_102980.2 | 4.259100199 |
| obsarabidopsis#01323 | AT1G33900     | 840287 | NM_103112.1 | 3.900200009 |
| obsarabidopsis#01338 |               | ---    | AC023913.7  | 3.012200087 |
| obsarabidopsis#01343 | ARF22         | ---    | NM_103162.2 | 3.026099861 |
| obsarabidopsis#01348 | AT1G34580     | 840362 | NM_103182.2 | 3.187899977 |
| obsarabidopsis#01350 |               | ---    | AC011436.7  | 3.266200036 |
| obsarabidopsis#01387 | AT1G36370     | 840543 | NM_103323.2 | 3.214000225 |
| obsarabidopsis#01412 | ATGLR3.3      | ---    | NM_103438.1 | 3.503000095 |
| obsarabidopsis#01523 |               | ---    | AL133314.1  | 3.490900004 |
| obsarabidopsis#01534 | ATPREP2       | 841387 | NM_103851.3 | 4.214499995 |
| obsarabidopsis#01540 | AT1G49850     | 841408 | NM_103872.2 | 4.877999902 |
| obsarabidopsis#01576 | AT1G50990     | 841521 | NM_103979.2 | 3.089300156 |
| obsarabidopsis#01626 | ATHB-15       | 841645 | NM_104096.2 | 3.017400026 |
| obsarabidopsis#01663 | AT1G53010     | 841734 | NM_104179.1 | 3.930599928 |
| obsarabidopsis#01691 | AT1G53730     | 841811 | NM_104251.2 | 4.686900064 |
| obsarabidopsis#01724 | AT1G54820     | 841921 | NM_104355.2 | 3.036800027 |
| obsarabidopsis#01732 | AT1G55110     | 841954 | NM_104384.3 | 5.614799857 |
| obsarabidopsis#01737 | AT1G55200     | 841963 | NM_104393.3 | 3.402399898 |
| obsarabidopsis#01771 | AT1G56310     | 842084 | NM_104510.1 | 3.643000185 |
| obsarabidopsis#01772 | CRT1          | 842087 | NM_104513.2 | 3.045899987 |
| obsarabidopsis#01787 | AT1G57570     | 842133 | NM_104554.2 | 3.252900004 |
| obsarabidopsis#01798 | AT1G57850     | 842160 | NM_104578.1 | 3.996999979 |
| obsarabidopsis#01823 | AT1G58480     | ---    | NM_104628.1 | 3.675599888 |
| obsarabidopsis#01887 | SC3           | ---    | NM_104806.2 | 3.246600017 |
| obsarabidopsis#01908 | AT1G61680     | 842465 | NM_104850.2 | 5.224400043 |
| obsarabidopsis#01916 | AT1G61860     | 842483 | NM_104868.3 | 3.121600018 |
| obsarabidopsis#01923 | 38809         | ---    | NM_104899.2 | 3.585099936 |
| obsarabidopsis#01981 | AT1G63730     | 842677 | NM_105050.1 | 6.590499938 |
| obsarabidopsis#02047 | AT1G65850     | 842896 | NM_105257.2 | 3.192600012 |
| obsarabidopsis#02066 | MYB20         | 842938 | NM_105294.2 | 3.785099864 |
| obsarabidopsis#02069 | AT1G66260     | 842943 | NM_105297.2 | 3.038800091 |
| obsarabidopsis#02108 | AT1G67300     | 843050 | NM_105398.2 | 3.563399792 |
| obsarabidopsis#02206 | ATCUL3B/CUL3B | ---    | NM_105635.3 | 4.583200216 |
| obsarabidopsis#02233 | KUP6          | 843366 | NM_105698.4 | 3.545600042 |
| obsarabidopsis#02290 | SERK1         | 843513 | NM_105841.3 | 3.804700017 |
| obsarabidopsis#02305 | AT1G72190     | 843551 | NM_105878.2 | 4.327900022 |
| obsarabidopsis#02356 | ATFX/GER1     | ---    | NM_105984.2 | 3.944499969 |
| obsarabidopsis#02473 | AT1G75890     | 843922 | NM_106239.1 | 4.442100048 |
| obsarabidopsis#02482 | CPK29         | 843936 | NM_106253.3 | 3.958700061 |
| obsarabidopsis#02496 | AT1G76370     | 843969 | NM_106286.3 | 5.245099843 |
| obsarabidopsis#02498 | AT1G76410     | 843974 | NM_106291.2 | 6.765599966 |
| obsarabidopsis#02523 | ADH1          | 844047 | NM_106362.1 | 3.005500019 |
| obsarabidopsis#02527 | AT1G77240     | 844060 | NM_106373.2 | 3.935899973 |

|                      |           |        |             |             |
|----------------------|-----------|--------|-------------|-------------|
| obsarabidopsis#02541 | AT1G77570 | 844092 | NM_106405.2 | 3.551199973 |
| obsarabidopsis#02599 | VHA-A     | 844228 | NM_106539.3 | 3.147300094 |
| obsarabidopsis#02704 | AT2G01370 | ---    | NM_126198.1 | 3.096699938 |
| obsarabidopsis#02717 | RIE1      | 814703 | NM_179593.2 | 3.296600223 |
| obsarabidopsis#02735 | ATPTR2-B  | ---    | NM_126265.2 | 3.264700055 |
| obsarabidopsis#02758 | AT2G02780 | 814807 | NM_126333.2 | 3.5521999   |
| obsarabidopsis#02873 | OPR3      | 815160 | NM_126619.2 | 4.177500248 |
| obsarabidopsis#02888 |           | ---    | AC006420.4  | 3.682300061 |
| obsarabidopsis#02930 |           | ---    | AC004483.3  | 3.438799977 |
| obsarabidopsis#02950 |           | ---    | AC006837.16 | 3.528700113 |
| obsarabidopsis#02974 |           | ---    | AC007187.5  | 3.245599985 |
| obsarabidopsis#03111 |           | ---    | AC005825.4  | 3.738599956 |
| obsarabidopsis#03173 | ERD7      | 816293 | NM_127337.2 | 3.574199915 |
| obsarabidopsis#03227 | AT2G18770 | 816392 | NM_127433.2 | 3.714199901 |
| obsarabidopsis#03286 | AT2G20040 | 816524 | NM_127562.2 | 5.318399861 |
| obsarabidopsis#03407 | AT2G23060 | 816836 | NM_127870.3 | 3.088       |
| obsarabidopsis#03411 | AGP17     | 816845 | NM_127877.2 | 3.084600031 |
| obsarabidopsis#03412 | NRAMP3    | 816847 | NM_127879.2 | 3.153099954 |
| obsarabidopsis#03587 | AT2G27060 | 817248 | NM_128264.2 | 3.027200103 |
| obsarabidopsis#03662 | EMB1997   | ---    | NM_179796.1 | 3.565799773 |
| obsarabidopsis#03665 | AT2G28940 | 817443 | AY078944.1  | 3.394699901 |
| obsarabidopsis#03675 | CYP707A2  | 817457 | NM_128466.1 | 3.173299789 |
| obsarabidopsis#03733 | CIPK11    | ---    | NM_128589.2 | 5.123200178 |
| obsarabidopsis#03736 | AT2G30420 | 817593 | NM_179814.1 | 3.722800024 |
| obsarabidopsis#03812 | AT2G32010 | 817761 | NM_128761.3 | 3.470999982 |
| obsarabidopsis#03849 | AT2G32860 | 817847 | NM_128846.3 | 3.584400028 |
| obsarabidopsis#03868 | AT2G33260 | 817889 | NM_128886.1 | 9.622300148 |
| obsarabidopsis#03904 | AT2G34210 | 817982 | NM_128972.1 | 3.021399945 |
| obsarabidopsis#03950 | ATEYA     | 818099 | NM_129084.2 | 3.182399988 |
| obsarabidopsis#04042 | ATORC2    | ---    | NM_129311.1 | 7.046900034 |
| obsarabidopsis#04066 | AT2G38100 | 818388 | NM_129366.1 | 3.025799996 |
| obsarabidopsis#04067 | ATMAK3    | 818391 | NM_129369.3 | 5.190000057 |
| obsarabidopsis#04068 | PSRP4     | 818392 | NM_129370.3 | 7.667899907 |
| obsarabidopsis#04092 | AT2G38730 | 818455 | NM_129430.3 | 3.063800067 |
| obsarabidopsis#04111 | AT2G39220 | 818507 | NM_129480.2 | 3.904500008 |
| obsarabidopsis#04119 | AT2G39420 | 818527 | NM_129500.2 | 4.792600632 |
| obsarabidopsis#04192 | LCR51     | ---    | NM_129665.2 | 3.318999976 |
| obsarabidopsis#04210 | AT2G41480 | 818746 | NM_129711.2 | 3.193099886 |
| obsarabidopsis#04222 | AT-HSFB3  | 818767 | NM_129732.1 | 3.843300082 |
| obsarabidopsis#04247 | AT2G42200 | 818820 | NM_129782.2 | 3.154300094 |
| obsarabidopsis#04289 | AT2G43230 | 818924 | NM_129885.2 | 3.345000148 |
| obsarabidopsis#04308 | AT2G43620 | 818964 | NM_129924.2 | 7.556100007 |
| obsarabidopsis#04337 |           | ---    | AF250957.1  | 3.162399948 |
| obsarabidopsis#04379 | GOS12     | 819128 | NM_130083.2 | 4.469099976 |

|                      |           |                 |             |             |
|----------------------|-----------|-----------------|-------------|-------------|
| obsarabidopsis#04386 | AT2G45290 | 819137          | NM_130092.2 | 4.087499768 |
| obsarabidopsis#04388 | GAE4      | 819139          | NM_130094.2 | 3.412299931 |
| obsarabidopsis#04424 | JAR1      | 819244          | NM_180122.1 | 3.874599904 |
| obsarabidopsis#04693 | PLDP2     | 819730          | NM_111436.3 | 3.339300096 |
| obsarabidopsis#04712 | AT3G06100 | 819783          | NM_111485.1 | 3.555400014 |
| obsarabidopsis#04726 | AT3G06500 | 819828          | NM_111526.3 | 3.115500025 |
| obsarabidopsis#04759 | ATGSL10   | 819903          | NM_111596.1 | 3.601500273 |
| obsarabidopsis#04868 | AT3G10340 | 820196          | NM_111869.3 | 3.041100085 |
| obsarabidopsis#04920 | AT3G11580 | 820331          | NM_111991.3 | 4.666800022 |
| obsarabidopsis#04923 | AT3G11710 | 820343          | NM_112003.2 | 3.765000194 |
| obsarabidopsis#04978 | AT3G13170 | 820506          | NM_112156.1 | 5.772400141 |
| obsarabidopsis#05107 | PAP1      | 820898          | NM_112521.3 | 3.040300012 |
| obsarabidopsis#05141 | ATMKK5    | ---             | NM_113017.3 | 3.171400011 |
| obsarabidopsis#05164 | TOPII     | 821972          | NM_113294.2 | 3.657800078 |
| obsarabidopsis#05224 |           | ---             | AL137189.2  | 3.784199908 |
| obsarabidopsis#05251 | AT3G43300 | 823405          | NM_114198.3 | 3.472700074 |
| obsarabidopsis#05279 | AT3G44610 | 823587          | NM_114329.2 | 3.250800014 |
| obsarabidopsis#05306 | AT3G45430 | 823681          | NM_114412.1 | 3.438699841 |
| obsarabidopsis#05315 | AT3G45830 | 823726          | NM_114452.2 | 3.246599972 |
| obsarabidopsis#05342 | AT3G46670 | 823820          | NM_114534.3 | 4.088999927 |
| obsarabidopsis#05371 | ASN1      | 823888          | NM_114602.2 | 3.08009994  |
| obsarabidopsis#05383 | ATATH2    | ---             | NM_114642.2 | 3.287500024 |
| obsarabidopsis#05511 | SCPL37    | ---             | NM_115060.2 | 3.462700129 |
| obsarabidopsis#05518 | SYP122    | 824405          | NM_115100.2 | 3.137199998 |
| obsarabidopsis#05564 | AT3G53620 | 824530          | NM_115222.1 | 3.461800069 |
| obsarabidopsis#05598 | AT3G54650 | 824630          | NM_115322.2 | 3.13169992  |
| obsarabidopsis#05687 | AREB3     | 824852          | NM_115544.2 | 3.951300025 |
| obsarabidopsis#05709 | CPK32     | 824920          | NM_115613.3 | 3.606500149 |
| obsarabidopsis#05712 | AT3G57600 | 824929          | NM_115620.1 | 3.5825001   |
| obsarabidopsis#05715 | NRPA1     | 824935          | NM_115626.1 | 3.769099832 |
| obsarabidopsis#05838 | AT3G62250 | ---             | NM_116090.2 | 3.411300659 |
| obsarabidopsis#05887 | AT4G00780 | 828009          | NM_116304.2 | 3.679699838 |
| obsarabidopsis#05899 | GBF2      | 826505          | NM_116342.2 | 4.868700206 |
| obsarabidopsis#05900 | AT4G01160 | ---             | NM_116346.2 | 3.012200058 |
| obsarabidopsis#05912 | EZA1      | ---             | NM_116433.2 | 4.235500067 |
| obsarabidopsis#05974 | AT4G05100 | 825855          | NM_116749.2 | 3.49330008  |
| obsarabidopsis#06079 | RHA1B     | 826738          | NM_117207.2 | 3.242300034 |
| obsarabidopsis#06089 | AT4G11730 | 826778          | NM_117242.1 | 3.388800085 |
| obsarabidopsis#06093 | AT4G11920 | 826799          | NM_117262.2 | 3.15929997  |
| obsarabidopsis#06111 | AT4G12770 | 826889///826890 | NM_117346.2 | 3.905099973 |
| obsarabidopsis#06140 | AT4G13890 | 827024///827027 | NM_117463.2 | 3.836300015 |
| obsarabidopsis#06201 | AT4G15390 | 827205          | NM_117627.3 | 3.024900079 |
| obsarabidopsis#06243 | AT4G16360 | 827331          | NM_117731.2 | 4.098300099 |
| obsarabidopsis#06275 | AT4G16940 | ---             | NM_117797.1 | 4.462099969 |

|                      |                |        |             |             |
|----------------------|----------------|--------|-------------|-------------|
| obsarabidopsis#06284 | AT4G17230      | 827435 | NM_117828.2 | 3.248600006 |
| obsarabidopsis#06288 | AT4G17360      | 827448 | NM_117840.2 | 4.647699893 |
| obsarabidopsis#06331 | AT4G18570      | 827588 | NM_117970.3 | 4.724399805 |
| obsarabidopsis#06504 | SHD            | 828520 | NM_118552.2 | 3.006299973 |
| obsarabidopsis#06524 | AT4G24840      | 828587 | NM_118617.3 | 3.020099938 |
| obsarabidopsis#06620 | AT4G28650      | 828983 | NM_119007.2 | 3.645999916 |
| obsarabidopsis#06648 | AT4G29570      | 829078 | NM_119102.2 | 3.21479997  |
| obsarabidopsis#06722 | MGD1           | 829306 | NM_119327.2 | 3.048499942 |
| obsarabidopsis#06805 | BGAL11         | 829653 | NM_119667.1 | 3.427600026 |
| obsarabidopsis#06819 | RHA3B          | 829700 | NM_119713.3 | 3.960700035 |
| obsarabidopsis#06823 | HMGB5          | 829709 | NM_119722.1 | 4.657199979 |
| obsarabidopsis#06880 | SKS15          | ---    | NM_119879.2 | 3.829400033 |
| obsarabidopsis#06996 | CIPK15         | 830556 | NM_120259.2 | 3.81400001  |
| obsarabidopsis#07007 |                | ---    | AL162874.1  | 3.071400002 |
| obsarabidopsis#07047 | AT5G04050      | 830284 | NM_120487.2 | 4.161000013 |
| obsarabidopsis#07110 | AT5G05600      | 830443 | NM_120642.2 | 3.110499881 |
| obsarabidopsis#07192 | PMSR3          | 830638 | NM_120829.2 | 3.247099996 |
| obsarabidopsis#07235 | AT5G08530      | 830752 | NM_120938.2 | 3.460300207 |
| obsarabidopsis#07265 | AT5G09890      | 830849 | NM_121026.3 | 3.128300071 |
| obsarabidopsis#07289 | CYCD4          | ---    | NM_121082.3 | 4.111700058 |
| obsarabidopsis#07352 | CPK7           | 831123 | NM_121286.2 | 3.039999962 |
| obsarabidopsis#07379 | AAC2           | 831193 | NM_121352.2 | 3.180899978 |
| obsarabidopsis#07433 | DEL2/E2FD/E2L1 | ---    | NM_121500.3 | 4.177299976 |
| obsarabidopsis#07503 | XPO1A          | 831565 | NM_121708.2 | 4.352699772 |
| obsarabidopsis#07507 | ATGSTF12       | 831586 | NM_121728.3 | 5.718399853 |
| obsarabidopsis#07535 | AT5G17850      | 831653 | NM_121791.1 | 3.689100146 |
| obsarabidopsis#07616 | AT5G19880      | 832110 | NM_121995.1 | 4.663999915 |
| obsarabidopsis#07621 | AT5G19980      | 832120 | NM_122005.3 | 4.575799942 |
| obsarabidopsis#07626 | AT5G20110      | 832133 | NM_122018.2 | 3.037200093 |
| obsarabidopsis#07627 | AT5G20150      | 832137 | NM_122022.2 | 4.521400094 |
| obsarabidopsis#07634 | AT5G20320      | 832154 | NM_122039.3 | 4.667500168 |
| obsarabidopsis#07656 | ATRAD51        | 832208 | NM_122092.2 | 3.028300047 |
| obsarabidopsis#07676 | ANAC089        | ---    | NM_122134.2 | 5.16110003  |
| obsarabidopsis#07771 | AT5G24880      | 832557 | NM_122397.1 | 3.382600024 |
| obsarabidopsis#07811 | AT5G26010      | 832670 | NM_122502.2 | 3.374000087 |
| obsarabidopsis#07955 | ATARLA1A       | 833747 | NM_123127.2 | 5.474799871 |
| obsarabidopsis#08104 | AT5G41820      | 834187 | NM_123547.1 | 3.186199903 |
| obsarabidopsis#08152 | AZF3           | 834334 | NM_123683.2 | 4.68899996  |
| obsarabidopsis#08157 | PHT6           | 834352 | NM_123700.1 | 3.121400058 |
| obsarabidopsis#08168 | AT5G43670      | 834387 | NM_123733.1 | 4.404300094 |
| obsarabidopsis#08312 | AT5G47240      | 834771 | NM_124095.2 | 3.749800086 |
| obsarabidopsis#08332 | ATPK5          | ---    | NM_124150.2 | 4.410599947 |
| obsarabidopsis#08371 | AT5G48800      | 834938 | NM_124257.2 | 3.256600022 |
| obsarabidopsis#08489 | COR78          | ---    | NM_124610.2 | 8.170599461 |

|                      |           |                 |             |             |
|----------------------|-----------|-----------------|-------------|-------------|
| obsarabidopsis#08508 | AT5G53010 | 835380          | NM_124680.3 | 3.156599939 |
| obsarabidopsis#08517 | AT5G53190 | 835400          | NM_124698.2 | 6.369499922 |
| obsarabidopsis#08536 | AT5G53810 | 835462          | NM_124760.2 | 3.082299978 |
| obsarabidopsis#08543 | AT5G53970 | 835480          | NM_124776.2 | 3.671300068 |
| obsarabidopsis#08550 | AT5G54060 | 835489          | NM_124785.1 | 3.834999934 |
| obsarabidopsis#08566 | AT5G54380 | 835526          | NM_124818.3 | 3.95630002  |
| obsarabidopsis#08567 | DFL1      | 835539          | NM_124831.2 | 3.069399953 |
| obsarabidopsis#08597 | AT5G55320 | 835625          | NM_124914.1 | 4.149999917 |
| obsarabidopsis#08600 | AT5G55370 | 835630          | NM_124919.1 | 3.277700186 |
| obsarabidopsis#08612 | AT5G55900 | 835688          | NM_124972.2 | 3.089299947 |
| obsarabidopsis#08683 | AT5G57920 | 835903          | NM_125177.2 | 3.269000024 |
| obsarabidopsis#08727 | AT5G58700 | 835984          | NM_125257.2 | 3.049299955 |
| obsarabidopsis#08743 | ATUCP2    | 836014          | NM_125287.3 | 3.153199911 |
| obsarabidopsis#08752 | AT5G59130 | 836031          | NM_125303.1 | 3.249800086 |
| obsarabidopsis#08863 | ATATH15   | ---             | NM_125563.1 | 5.180199891 |
| obsarabidopsis#08884 | PRH75     | 836340          | NM_125613.2 | 3.123000026 |
| obsarabidopsis#08945 | ATHDH     | 836509          | NM_125784.2 | 3.894799888 |
| obsarabidopsis#09027 | MLO10     | 836727          | NM_125994.1 | 4.350800067 |
| obsarabidopsis#09036 | AT5G66150 | 836747          | NM_126013.1 | 3.559599817 |
| obsarabidopsis#09176 | AT5G13380 | 831179          | NM_121341.2 | 4.132699966 |
| obsarabidopsis#09224 | AT4G30800 | 829203          | NM_119226.2 | 4.389799803 |
| obsarabidopsis#09273 | CYP71B5   | 824495          | NM_115188.3 | 3.802200079 |
| obsarabidopsis#09276 | AT1G14950 | 838060          | NM_101364.3 | 3.796699941 |
| obsarabidopsis#09303 | AT5G05900 | 830475          | NM_120672.1 | 3.154299945 |
| obsarabidopsis#09330 | AT5G40990 | 834101          | NM_123464.1 | 5.72149986  |
| obsarabidopsis#09381 | AT3G44860 | 823620///823621 | NM_114355.2 | 3.240999699 |
| obsarabidopsis#09492 | AT4G00880 | 827989          | NM_116314.3 | 3.119300008 |
| obsarabidopsis#09500 | PMSR1     | 836286          | NM_125558.2 | 5.798099875 |
| obsarabidopsis#09574 | AT3G45930 | 823736///823777 | NM_114462.3 | 3.727199912 |
| obsarabidopsis#09592 | AT1G29460 | 839822          | NM_102686.2 | 3.739799857 |
| obsarabidopsis#09687 | AT1G28590 | 839759          | NM_102627.2 | 4.174299881 |
| obsarabidopsis#09700 | CYP705A6  | 815066          | NM_126545.1 | 3.312999904 |
| obsarabidopsis#09844 | AT4G16240 | 827318          | NM_117720.1 | 4.865699768 |
| obsarabidopsis#09856 | AT4G26550 | 828761          | NM_118788.2 | 3.165100038 |
| obsarabidopsis#09931 | AT5G26790 | 832737          | NM_122561.1 | 3.737299979 |
| obsarabidopsis#09934 | AT4G27585 | ---             | NM_118894.2 | 5.013600111 |
| obsarabidopsis#10064 | SYP73     | 825318          | NM_116010.1 | 4.105300188 |
| obsarabidopsis#10096 | AT5G01080 | 831873          | NM_120186.1 | 3.27730003  |
| obsarabidopsis#10111 | AT2G46510 | 819262          | NM_130216.2 | 3.476799965 |
| obsarabidopsis#10141 | AT4G03120 | 828071          | NM_116546.1 | 3.005299807 |
| obsarabidopsis#10162 | AT2G27375 | ---             | NM_128297.1 | 3.736199975 |
| obsarabidopsis#10247 | AT1G02080 | 839244          | NM_100088.3 | 4.079699993 |
| obsarabidopsis#10290 | AT1G02870 | 839496          | NM_100168.2 | 3.204900086 |
| obsarabidopsis#10309 | AT1G03220 | 838517///838532 | NM_100204.2 | 3.058899879 |

|                      |           |                 |             |             |
|----------------------|-----------|-----------------|-------------|-------------|
| obsarabidopsis#10495 | AT1G06770 | 837188          | NM_100554.3 | 4.600199789 |
| obsarabidopsis#10550 | AT1G08135 | ---             | NM_179279.1 | 3.351999998 |
| obsarabidopsis#10604 | AT1G09230 | 837443          | NM_100793.3 | 3.565199912 |
| obsarabidopsis#10615 | AT1G09410 | 837463          | NM_100811.1 | 3.322199985 |
| obsarabidopsis#10620 | AT1G09460 | 837469          | NM_100817.2 | 5.303800225 |
| obsarabidopsis#10760 | PAK       | ---             | NM_101115.2 | 3.041299939 |
| obsarabidopsis#10778 | AT1G12670 | ---             | NM_101137.1 | 3.265700042 |
| obsarabidopsis#10788 | AT1G12890 | ---             | NM_101160.1 | 5.829199791 |
| obsarabidopsis#10802 | AT1G13250 | 837885          | NM_101196.2 | 14.7778995  |
| obsarabidopsis#10833 | AT1G13780 | ---             | NM_101246.4 | 3.695900083 |
| obsarabidopsis#10875 | AT1G14530 | 838015          | NM_101320.2 | 3.701800108 |
| obsarabidopsis#10909 | AT1G15330 | 838102          | NM_101402.2 | 3.333399892 |
| obsarabidopsis#11093 | AT1G18910 | 838472          | NM_101748.1 | 6.279600024 |
| obsarabidopsis#11113 | AT1G19180 | 838501          | NM_101776.2 | 3.544800282 |
| obsarabidopsis#11125 | AT1G19380 | 838521          | NM_101795.3 | 3.354999542 |
| obsarabidopsis#11177 | AT1G20480 | 838636          | NM_101898.2 | 13.05110049 |
| obsarabidopsis#11201 | AT1G20890 | 838682          | NM_101942.2 | 3.207499951 |
| obsarabidopsis#11375 | AT1G24390 | 839056          | NM_102285.1 | 3.567699924 |
| obsarabidopsis#11463 | AT1G27100 | 839599          | NM_102472.3 | 5.352699757 |
| obsarabidopsis#11471 | AT1G27250 | ---             | NM_102486.1 | 3.375800028 |
| obsarabidopsis#11572 | AT1G29560 | ---             | NM_102696.1 | 3.213499963 |
| obsarabidopsis#11591 | AT1G30010 | 839880          | NM_102741.3 | 3.032099962 |
| obsarabidopsis#11599 | AT1G30140 | 839894          | NM_102754.2 | 3.385300007 |
| obsarabidopsis#11626 | AT1G30750 | 839955          | NM_102811.1 | 4.471099854 |
| obsarabidopsis#11641 | AT1G31020 | 839988          | NM_102840.3 | 16.17030092 |
| obsarabidopsis#11646 | AT1G31130 | 839998          | NM_102851.3 | 3.668799758 |
| obsarabidopsis#11668 | AT1G31500 | 840040          | NM_102889.3 | 3.100600123 |
| obsarabidopsis#11792 | AT1G34490 | ---             | NM_103171.1 | 3.507400155 |
| obsarabidopsis#11794 | AT1G34520 | 840351///840354 | NM_103174.1 | 3.539700031 |
| obsarabidopsis#11803 | TT1       | ---             | NM_103201.2 | 5.684799969 |
| obsarabidopsis#11829 | AT1G35610 | 840457          | NM_103258.1 | 3.146900058 |
| obsarabidopsis#11871 | AT1G37010 | 840611          | NM_103356.1 | 3.234599948 |
| obsarabidopsis#11876 | AT1G41820 | 840790          | NM_103406.1 | 4.333200097 |
| obsarabidopsis#11987 | AT1G47300 | 841133          | NM_103624.1 | 5.559099883 |
| obsarabidopsis#12000 | AT1G47550 | 841164///841165 | NM_103648.2 | 3.306899965 |
| obsarabidopsis#12091 | AT1G49310 | 841354          | NM_103821.2 | 3.036299944 |
| obsarabidopsis#12155 | AT1G50470 | 841469          | NM_103930.1 | 3.233500123 |
| obsarabidopsis#12175 | AT1G50870 | ---             | NM_103967.1 | 3.223699927 |
| obsarabidopsis#12228 | AT1G51940 | 841622          | NM_104075.2 | 3.296199888 |
| obsarabidopsis#12268 | AT1G52910 | 841724          | NM_104169.2 | 3.481200069 |
| obsarabidopsis#12340 | AT1G54540 | 841896          | NM_104332.1 | 3.382199973 |
| obsarabidopsis#12347 | AT1G54700 | 841911          | NM_104345.1 | 4.038300209 |
| obsarabidopsis#12508 | AT1G59920 | ---             | NM_104684.1 | 4.341200054 |
| obsarabidopsis#12543 | AT1G60670 | 842361          | NM_104750.3 | 3.403499842 |



|                      |              |                 |             |             |
|----------------------|--------------|-----------------|-------------|-------------|
| obsarabidopsis#12558 | LCR66/PDF2.4 | ---             | NM_104788.3 | 3.641299993 |
| obsarabidopsis#12567 | AT1G61210    | 842414          | NM_104802.3 | 5.184300065 |
| obsarabidopsis#12635 | AT1G62530    | 842550          | NM_104932.1 | 3.162299931 |
| obsarabidopsis#12647 | AT1G62860    | ---             | NM_104964.1 | 3.382199973 |
| obsarabidopsis#12735 | AT1G64670    | 842775          | NM_105142.2 | 3.359000027 |
| obsarabidopsis#12822 | AT1G66420    | ---             | NM_105313.1 | 3.527500033 |
| obsarabidopsis#12840 | AT1G66820    | 843000          | NM_105353.2 | 3.664399907 |
| obsarabidopsis#12930 | AT1G68660    | 843196          | NM_105538.2 | 5.329399943 |
| obsarabidopsis#12936 | AT1G68820    | 843214          | NM_105556.3 | 3.709299803 |
| obsarabidopsis#12948 | AT1G69080    | 843240          | NM_105578.1 | 3.291499935 |
| obsarabidopsis#13151 | AT1G73570    | 843691          | NM_106015.1 | 3.781199902 |
| obsarabidopsis#13177 | AT1G74290    | 843768///843769 | NM_106089.1 | 3.565999985 |
| obsarabidopsis#13239 | AT1G75860    | 843919          | NM_106236.1 | 4.756799817 |
| obsarabidopsis#13315 | AT1G77460    | 844082          | NM_106395.1 | 3.385100007 |
| obsarabidopsis#13413 | AT1G79520    | 844290          | NM_106600.2 | 3.541899927 |
| obsarabidopsis#13521 | ANAC058      | ---             | NM_112725.1 | 3.493299901 |
| obsarabidopsis#13556 | UBC19        | 821545          | NM_112897.2 | 3.735699981 |
| obsarabidopsis#13562 | AT3G20190    | 821563          | NM_112910.3 | 3.647699915 |
| obsarabidopsis#13580 | AT3G20860    | 821634          | NM_112977.1 | 4.36349985  |
| obsarabidopsis#13625 | ATECP31      | 821821          | NM_113149.2 | 4.17750001  |
| obsarabidopsis#13694 | ATVAMP728    | ---             | NM_113401.1 | 4.441300094 |
| obsarabidopsis#13880 | AT3G42580    | ---             | NM_114125.1 | 3.421899915 |
| obsarabidopsis#13884 | AT3G42660    | 823286          | NM_114133.1 | 4.65169996  |
| obsarabidopsis#13900 | AT3G42920    | ---             | NM_114160.1 | 3.619799972 |
| obsarabidopsis#14055 | AT3G45690    | 823711          | NM_114438.1 | 4.546500176 |
| obsarabidopsis#14151 | AT3G47960    | 823951          | NM_114665.2 | 3.587899923 |
| obsarabidopsis#14247 | AT3G50120    | 824174          | NM_114872.1 | 3.833999991 |
| obsarabidopsis#14424 | AT3G53980    | 824565          | NM_115258.2 | 3.197600245 |
| obsarabidopsis#14427 | AT3G54070    | 824574          | NM_115267.1 | 3.399399996 |
| obsarabidopsis#14431 | AT3G54160    | ---             | NM_115276.1 | 3.794699967 |
| obsarabidopsis#14432 | AT3G54190    | 824586          | NM_115279.2 | 3.11559999  |
| obsarabidopsis#14521 | AT3G56260    | 824792          | NM_115484.2 | 3.335800052 |
| obsarabidopsis#14561 | AT3G56900    | 824857          | NM_115549.2 | 3.418400111 |
| obsarabidopsis#14618 | AT3G58020    | ---             | NM_115664.2 | 4.857899845 |
| obsarabidopsis#14629 | ATBS14A      | ---             | NM_115679.2 | 3.481499791 |
| obsarabidopsis#14648 | AT3G58370    | ---             | NM_115699.1 | 3.741200089 |
| obsarabidopsis#14655 | AT3G58450    | 825014          | NM_180386.1 | 3.800799966 |
| obsarabidopsis#14715 | TXR1         | 825097          | NM_115790.2 | 8.178800106 |
| obsarabidopsis#14753 | AT3G59930    | 825163///833312 | NM_115856.3 | 3.961899757 |
| obsarabidopsis#14824 | AT3G61180    | 825290          | NM_115982.2 | 3.046299934 |
| obsarabidopsis#14828 | AT3G61250    | 825297          | NM_115989.3 | 3.331199884 |
| obsarabidopsis#14847 | AT3G61550    | 825328          | NM_116020.2 | 3.133099854 |
| obsarabidopsis#14874 | AT3G62070    | ---             | NM_116072.2 | 3.800899863 |
| obsarabidopsis#14947 | AT3G63290    | 825504          | NM_116194.3 | 4.973100007 |

|                      |           |        |             |             |
|----------------------|-----------|--------|-------------|-------------|
| obsarabidopsis#14984 | AT4G00560 | 827978 | NM_116280.2 | 4.041800141 |
| obsarabidopsis#15204 | SULTR1    | ---    | NM_116931.2 | 3.364600062 |
| obsarabidopsis#15387 | AT4G11090 | 826710 | NM_117179.2 | 3.284799933 |
| obsarabidopsis#15459 | MYB42     | 826844 | NM_117305.1 | 12.13549995 |
| obsarabidopsis#15487 | AT4G12850 | ---    | NM_117354.1 | 3.390400052 |
| obsarabidopsis#15635 | AT4G19490 | 827690 | NM_118069.2 | 3.165100038 |
| obsarabidopsis#15692 | AT4G20810 | ---    | NM_118199.1 | 17.20080078 |
| obsarabidopsis#15793 | AT4G23340 | ---    | NM_118463.2 | 3.318200082 |
| obsarabidopsis#15800 | AT3G57785 | 824948 | NM_115639.2 | 4.574399948 |
| obsarabidopsis#15853 | AT4G24300 | 828533 | NM_118563.1 | 3.30189991  |
| obsarabidopsis#15883 | AT4G24890 | 828591 | NM_118621.2 | 3.57220006  |
| obsarabidopsis#15921 | AT4G25680 | 828673 | NM_118700.1 | 3.437000036 |
| obsarabidopsis#15963 | AT4G26470 | 828753 | NM_118780.2 | 3.01060006  |
| obsarabidopsis#16035 | AT4G27850 | 828898 | NM_118923.1 | 3.432000041 |
| obsarabidopsis#16071 | RIC7      | 828974 | NM_118998.1 | 3.58829987  |
| obsarabidopsis#16086 | AT4G28890 | 829010 | NM_119033.3 | 3.126600042 |
| obsarabidopsis#16147 | AT4G30400 | 829163 | NM_119186.2 | 4.651499867 |
| obsarabidopsis#16151 | AT4G30530 | 829176 | NM_119199.3 | 3.326900482 |
| obsarabidopsis#16160 | AT4G30710 | ---    | NM_119217.2 | 7.132200003 |
| obsarabidopsis#16182 | AT4G31130 | 829241 | NM_119263.3 | 3.07099998  |
| obsarabidopsis#16193 | AT4G31540 | 829281 | NM_119303.2 | 3.263700128 |
| obsarabidopsis#16246 | AT4G32480 | ---    | NM_119400.1 | 5.372099876 |
| obsarabidopsis#16356 | KCS2      | 839578 | NM_119616.2 | 3.958899796 |
| obsarabidopsis#16403 | AT4G35510 | 829703 | NM_119716.4 | 3.228900075 |
| obsarabidopsis#16445 | AT4G36290 | 829786 | NM_119797.2 | 3.3046      |
| obsarabidopsis#16548 | AT4G38900 | 830045 | NM_120050.2 | 3.056799948 |
| obsarabidopsis#16730 | AT5G02960 | ---    | NM_120374.2 | 6.082199842 |
| obsarabidopsis#16748 | AT5G03200 | 831908 | NM_120398.1 | 3.127300099 |
| obsarabidopsis#16828 | AT5G04780 | ---    | NM_120560.2 | 3.797799826 |
| obsarabidopsis#16880 | AT5G06010 | ---    | NM_120683.1 | 12.18369973 |
| obsarabidopsis#16913 | HAT14     | 830560 | NM_120754.3 | 4.042099953 |
| obsarabidopsis#17003 | AT5G09560 | ---    | NM_120993.2 | 3.533799976 |
| obsarabidopsis#17083 | AT5G11230 | 830993 | NM_121161.1 | 4.476300031 |
| obsarabidopsis#17091 | AT5G11360 | 831007 | NM_121174.2 | 3.446000338 |
| obsarabidopsis#17115 | AT5G11660 | ---    | NM_121204.1 | 3.027700067 |
| obsarabidopsis#17119 | AGP15     | 831046 | NM_121212.2 | 3.084699988 |
| obsarabidopsis#17228 | AT5G14170 | 831267 | NM_121421.2 | 3.749499917 |
| obsarabidopsis#17254 | AT5G14550 | 831306 | NM_121459.3 | 3.203400016 |
| obsarabidopsis#17352 | AT5G16410 | ---    | NM_121646.2 | 4.33009994  |
| obsarabidopsis#17388 | AT5G17120 | ---    | NM_121718.1 | 3.337999954 |
| obsarabidopsis#17416 | AT5G17840 | 831652 | NM_121790.2 | 3.117899776 |
| obsarabidopsis#17465 | ATBPM1    | 832018 | NM_121905.2 | 3.892099857 |
| obsarabidopsis#17496 | AT5G19570 | 832077 | NM_121962.1 | 3.91470021  |
| obsarabidopsis#17539 | AT5G20540 | 832176 | NM_122061.3 | 3.034999967 |

|                      |           |        |             |             |
|----------------------|-----------|--------|-------------|-------------|
| obsarabidopsis#17552 | AT5G20770 | ---    | NM_122084.1 | 3.201200008 |
| obsarabidopsis#17731 | AT5G26220 | 832691 | NM_122523.2 | 3.485100091 |
| obsarabidopsis#17765 | AT5G27020 | 832760 | NM_122584.1 | 3.050099963 |
| obsarabidopsis#17830 | AT5G28180 | ---    | NM_122701.1 | 3.314400077 |
| obsarabidopsis#17851 | AT5G28490 | 832941 | NM_122732.1 | 3.217100024 |
| obsarabidopsis#17863 |           | ---    | AF272705.1  | 3.059900165 |
| obsarabidopsis#17950 | AT5G34870 | 833422 | NM_122876.1 | 3.212200023 |
| obsarabidopsis#18017 | AT5G36680 | ---    | NM_123035.1 | 3.007300019 |
| obsarabidopsis#18040 | AT5G37130 | 833685 | NM_123072.2 | 3.881100059 |
| obsarabidopsis#18050 | AT5G37290 | 833703 | NM_123088.2 | 3.979700029 |
| obsarabidopsis#18063 | AT5G37560 | 833734 | NM_123115.1 | 3.065100037 |
| obsarabidopsis#18111 | AT5G38670 | 833857 | NM_123228.1 | 3.795599937 |
| obsarabidopsis#18159 | AT5G39970 | 833994 | NM_123360.3 | 4.025900126 |
| obsarabidopsis#18198 | AT5G40680 | 834068 | NM_123433.1 | 3.862499952 |
| obsarabidopsis#18212 | AT5G41030 | ---    | NM_123468.1 | 3.65290004  |
| obsarabidopsis#18399 | AT5G45630 | 834603 | NM_123931.2 | 3.402700007 |
| obsarabidopsis#18403 | AT5G45770 | 834616 | NM_123944.2 | 3.942800045 |
| obsarabidopsis#18407 | WOX8      | 834638 | NM_123966.2 | 4.697799921 |
| obsarabidopsis#18450 | AT5G46940 | 834740 | NM_124065.1 | 4.348799944 |
| obsarabidopsis#18491 | AT5G48090 | 834861 | NM_124183.1 | 3.201400042 |
| obsarabidopsis#18496 | AT5G48250 | 834878 | NM_124200.2 | 3.335800052 |
| obsarabidopsis#18515 | AT5G48660 | ---    | NM_124243.1 | 3.198700019 |
| obsarabidopsis#18518 | AT5G48710 | 834929 | NM_124248.1 | 3.646500051 |
| obsarabidopsis#18581 | AT5G50060 | ---    | NM_124385.1 | 3.176900268 |
| obsarabidopsis#18642 | AT5G51380 | 835212 | NM_124517.2 | 3.227399945 |
| obsarabidopsis#18648 | AT5G51480 | 835222 | NM_124527.3 | 5.231000066 |
| obsarabidopsis#18651 | AT5G51550 | 835229 | NM_124534.2 | 4.202799797 |
| obsarabidopsis#18793 | AT5G54970 | 835588 | NM_124879.2 | 3.207899928 |
| obsarabidopsis#18794 | AT5G54980 | 835589 | NM_124880.2 | 4.109300017 |
| obsarabidopsis#18811 | AT5G55510 | ---    | NM_124933.4 | 5.517000198 |
| obsarabidopsis#18956 | AT5G58960 | 836013 | NM_125286.4 | 3.279099822 |
| obsarabidopsis#18972 | AT5G59480 | 836067 | NM_125339.2 | 5.172299862 |
| obsarabidopsis#18999 | AT5G60140 | 836136 | NM_125407.2 | 3.060699821 |
| obsarabidopsis#19003 | AT5G60190 | 836141 | NM_125412.2 | 3.508699987 |
| obsarabidopsis#19006 | AT5G60260 | 836148 | NM_125419.1 | 5.008599997 |
| obsarabidopsis#19008 | AT5G60330 | ---    | NM_125426.1 | 3.32099998  |
| obsarabidopsis#19011 | AT5G60370 | ---    | NM_125430.2 | 3.880599916 |
| obsarabidopsis#19034 | AT5G60840 | 836205 | NM_125477.3 | 5.200200081 |
| obsarabidopsis#19043 | AT5G61090 | 836230 | NM_125502.1 | 3.735600054 |
| obsarabidopsis#19202 | AT5G64710 | 836592 | NM_125867.2 | 3.449999958 |
| obsarabidopsis#19236 | AT5G65650 | 836691 | NM_125963.2 | 3.108200073 |
| obsarabidopsis#19272 | AT5G66800 | 836813 | NM_126078.1 | 3.265800089 |
| obsarabidopsis#19374 | AT1G47680 | 841178 | NM_103661.1 | 3.779899955 |
| obsarabidopsis#19390 | AT3G42810 | ---    | NM_114149.1 | 4.976399899 |

|                      |           |        |             |             |
|----------------------|-----------|--------|-------------|-------------|
| obsarabidopsis#19449 | AT4G04830 | 825820 | NM_116721.2 | 4.592099905 |
| obsarabidopsis#19503 | AT5G02360 | 831773 | NM_120314.1 | 3.829299986 |
| obsarabidopsis#19521 | AT5G26350 | ---    | NM_122536.1 | 3.682100058 |
| obsarabidopsis#19541 | AT1G41750 | ---    | NM_103401.1 | 4.63710016  |
| obsarabidopsis#19584 | CYP705A18 | 821552 | NM_112900.2 | 4.017300211 |
| obsarabidopsis#19591 | AT1G62120 | ---    | NM_104893.2 | 3.179899931 |
| obsarabidopsis#19731 | RALFL26   | 822109 | NM_113422.2 | 9.552999794 |
| obsarabidopsis#19758 | ATGA2OX3  | 818019 | NM_129007.1 | 3.568999887 |
| obsarabidopsis#19818 | AT4G18395 | 827569 | NM_117951.1 | 5.838799953 |
| obsarabidopsis#19954 | AT3G23605 | 821940 | NM_113264.2 | 3.975900233 |
| obsarabidopsis#19975 | AT3G25655 | 822153 | NM_113464.2 | 3.125799894 |
| obsarabidopsis#20017 | AT2G25735 | 817115 | NM_128133.1 | 3.068800032 |
| obsarabidopsis#20099 | AT3G24506 | 822043 | NM_113360.2 | 3.970900148 |
| obsarabidopsis#20116 | AT4G14615 | 827111 | NM_117543.2 | 3.564900041 |
| obsarabidopsis#20196 | AT1G05805 | 837090 | NM_100461.4 | 3.012699902 |
| obsarabidopsis#20200 | AT1G54710 | 841912 | NM_104346.2 | 4.034099936 |
| obsarabidopsis#20209 | AT4G16515 | 827350 | NM_117750.1 | 3.459999975 |
| obsarabidopsis#20317 | AT4G35905 | 829745 | NM_119757.1 | 3.955000103 |
| obsarabidopsis#20343 | AT2G05590 | 815108 | NM_126582.1 | 3.976899981 |
| obsarabidopsis#20362 | AT1G15040 | ---    | NM_101374.2 | 3.151200056 |
| obsarabidopsis#20389 | AT1G27590 | 839650 | NM_102523.2 | 3.503800035 |
| obsarabidopsis#20507 | AT1G80450 | 844384 | NM_106693.2 | 3.832000107 |
| obsarabidopsis#20508 | AT1G80470 | ---    | NM_106695.1 | 3.516000107 |
| obsarabidopsis#20512 | AT1G80510 | 844390 | NM_106699.1 | 3.059699953 |
| obsarabidopsis#20525 | AT1G80710 | ---    | NM_106719.2 | 3.954100013 |
| obsarabidopsis#20527 | AT1G80810 | 844420 | NM_106729.1 | 3.030800045 |
| obsarabidopsis#20552 | AT2G01580 | 814687 | NM_126219.3 | 3.980099916 |
| obsarabidopsis#20707 | AT2G05970 | ---    | NM_126610.1 | 3.489699996 |
| obsarabidopsis#20763 | AT2G11620 | ---    | NM_126861.1 | 3.270900011 |
| obsarabidopsis#20783 | AT2G13600 | 815845 | NM_126939.1 | 3.201899976 |
| obsarabidopsis#20905 | AT2G17230 | 816228 | NM_127277.2 | 3.516100049 |
| obsarabidopsis#20947 | AT2G18245 | 816340 | NM_127382.2 | 3.708099991 |
| obsarabidopsis#20967 | AT2G18860 | ---    | NM_127442.2 | 3.480799913 |
| obsarabidopsis#21013 | AT2G20020 | 816521 | NM_127560.3 | 5.030999966 |
| obsarabidopsis#21035 | AT2G20390 | 816558 | NM_127598.2 | 5.648699939 |
| obsarabidopsis#21087 | EMB2219   | 816708 | NM_127741.2 | 4.394799948 |
| obsarabidopsis#21213 | AT2G25190 | 817057 | NM_128076.2 | 9.134900391 |
| obsarabidopsis#21360 | AT2G28410 | 817389 | NM_128401.2 | 3.336399913 |
| obsarabidopsis#21428 | AT2G30600 | 817610 | NM_128612.2 | 4.362800062 |
| obsarabidopsis#21448 | AT2G31120 | 817667 | NM_128668.1 | 3.067699979 |
| obsarabidopsis#21474 | AT2G31600 | ---    | NM_128717.2 | 3.669999957 |
| obsarabidopsis#21484 | AT2G31920 | ---    | NM_128750.1 | 3.171499968 |
| obsarabidopsis#21528 | AT2G32960 | ---    | NM_128856.3 | 3.012899935 |
| obsarabidopsis#21614 | AT2G34920 | 818057 | NM_129045.2 | 3.203600049 |

|                      |           |                 |             |             |
|----------------------|-----------|-----------------|-------------|-------------|
| obsarabidopsis#21742 | AT2G37910 | 818367          | NM_129347.1 | 3.374299884 |
| obsarabidopsis#21955 | AT2G42340 | 818835          | NM_129796.1 | 3.709899902 |
| obsarabidopsis#22039 | AT2G44240 | 819032          | NM_129988.2 | 3.289999902 |
| obsarabidopsis#22192 | AT2G47820 | 819394          | NM_130349.2 | 3.622500032 |
| obsarabidopsis#22206 | AT2G48050 | 819418          | NM_130372.1 | 3.367900029 |
| obsarabidopsis#22210 | AT2G48090 | 819421          | NM_130376.1 | 4.302900195 |
| obsarabidopsis#22227 | AT3G01230 | ---             | NM_110989.3 | 3.66960007  |
| obsarabidopsis#22326 | AT3G03210 | 821222          | NM_111191.3 | 13.57289959 |
| obsarabidopsis#22375 | AT3G04130 | 819568          | NM_111284.2 | 3.875400186 |
| obsarabidopsis#22386 | AT3G04370 | 819592          | NM_111308.2 | 3.612799965 |
| obsarabidopsis#22411 | AT3G04780 | 819638          | NM_111350.2 | 3.699699998 |
| obsarabidopsis#22414 | AT3G04850 | ---             | NM_111357.3 | 3.678500086 |
| obsarabidopsis#22419 | AT3G04950 | 819655          | NM_111367.2 | 3.497300029 |
| obsarabidopsis#22440 | AT3G05320 | 819696          | NM_111405.2 | 3.663400054 |
| obsarabidopsis#22528 | AT3G07000 | 819885          | NM_111580.2 | 3.379800085 |
| obsarabidopsis#22681 | AT3G10680 | 820237          | NM_111904.1 | 3.856600046 |
| obsarabidopsis#22779 | AT3G12660 | 820446          | NM_112101.1 | 4.091899991 |
| obsarabidopsis#22870 | AT3G14180 | 820635          | NM_112274.3 | 3.131700039 |
| obsarabidopsis#23161 | AT3G19200 | 821454          | NM_112807.1 | 4.020800114 |
| obsarabidopsis#23346 | AT3G22410 | ---             | NM_113138.2 | 4.344799906 |
| obsarabidopsis#23756 |           | ---             | AP001296.1  | 5.451599777 |
| obsarabidopsis#23778 |           | ---             | AP001301.1  | 3.254000008 |
| obsarabidopsis#23822 | AT3G44770 | 823608          | NM_114346.1 | 3.685299993 |
| obsarabidopsis#23871 | AT3G49380 | 824100          | NM_114798.1 | 3.209900111 |
| obsarabidopsis#23894 | AT3G51020 | ---             | NM_114962.1 | 3.415799975 |
| obsarabidopsis#24039 | AT4G01780 | 824027///828078 | NM_116408.1 | 3.824900091 |
| obsarabidopsis#24088 | AT4G03480 | 827906          | NM_116586.1 | 3.43810007  |
| obsarabidopsis#24108 | AT4G03830 | 825690          | NM_116621.1 | 3.681300044 |
| obsarabidopsis#24145 | AT4G08130 | ---             | NM_116882.1 | 3.314200044 |
| obsarabidopsis#24276 |           | ---             | Z97339.2    | 3.936499953 |
| obsarabidopsis#24278 | AT4G15640 | 827241          | NM_117655.3 | 3.061100006 |
| obsarabidopsis#24403 | AT4G21340 | 827884          | NM_118254.3 | 3.280600131 |
| obsarabidopsis#24433 | AT4G23330 | 828432          | NM_118462.1 | 3.113900065 |
| obsarabidopsis#24490 | AT4G27810 | ---             | NM_118919.2 | 3.059100002 |
| obsarabidopsis#24581 | AT4G36170 | 829774          | NM_119784.1 | 3.938600063 |
| obsarabidopsis#24615 | AT4G39440 | 830099          | NM_120104.1 | 3.37929976  |

**Gene Description**

unknown protein

unknown protein

LIL3:1

unknown protein

unknown protein

GRF6 (GF14 LAMBDA)

BCCP2

lyase

SMO1-3 (STEROL 4-ALPHA METHYL OXIDASE)

AIR3

LHY (LATE ELONGATED HYPOCOTYL)

DNA binding / transcription factor

zinc ion binding

Arabidopsis thaliana chromosome I BAC T14P4 genomic sequence,complete sequence

UVH6 (ULTRAVIOLET HYPERSENSITIVE 6)

binding

carbohydrate transporter/ sugar porter

kinase

UDP-glycosyltransferase/ transferase, transferring glycosyl groups

unknown protein

unknown protein

ATP binding / carbohydrate binding / kinase/ protein kinase/ protein serine/threonine kinase/ protein-tyrosine kinase/ sugar

ATP binding

unknown protein

AVP1

SRG1 (SENESCENCE-RELATED GENE 1)

catalytic/ hydrolase

transferase/ transferase, transferring glycosyl groups

glutathione dehydrogenase (ascorbate)

MP (MONOPTEROS)

ATP binding / protein kinase/ protein serine/threonine kinase/ protein-tyrosine kinase

DNA binding / transcription factor

SULTR1

transferase, transferring glycosyl groups

copper ion binding / electron transporter

unknown protein

peptidase/ protein binding / ubiquitin-protein ligase/ zinc ion binding

unknown protein

oxidoreductase

ARAB-1

PAI3 (PHOSPHORIBOSYLANTHRANILATE ISOMERASE 3)

electron carrier

cationic amino acid transporter

ATSYP24

transporter

GTP binding

Arabidopsis thaliana chromosome 1 BAC F7P12 genomic sequence,complete sequence.

ARF22

carbohydrate transporter/ sugar porter

Arabidopsis thaliana chromosome III BAC F3L24 genomic sequence,complete sequence

glycine hydroxymethyltransferase

ATGLR3.3

Arabidopsis thaliana DNA chromosome 3, BAC clone F12A12

ATPREP2

protein binding / ubiquitin-protein ligase/ zinc ion binding

ATP binding / protein kinase/ protein serine/threonine kinase/ protein-tyrosine kinase

ATHB-15 (INCURVATA 4)

protein binding / ubiquitin-protein ligase/ zinc ion binding

ATP binding / protein kinase/ protein serine/threonine kinase/ protein-tyrosine kinase

ATP binding / kinase/ protein kinase/ protein serine/threonine kinase/ protein-tyrosine kinase

nucleic acid binding / transcription factor/ zinc ion binding

ATP binding / kinase/ protein kinase/ protein serine/threonine kinase/ protein-tyrosine kinase

3'-5' exonuclease/ nucleic acid binding

CRT1 (CALRETICULIN 1)

unknown protein

transmembrane receptor

carboxylic ester hydrolase/ hydrolase, acting on ester bonds / lipase

SC3 (SECRETORY CARRIER 3)

lyase

ATP binding / kinase/ protein kinase/ protein serine/threonine kinase/ protein-tyrosine kinase

APR2 (5'ADENYLYLPHOSPHOSULFATE REDUCTASE 2)

ATP binding / nucleoside-triphosphatase/ nucleotide binding / transmembrane receptor

ATP binding / transmembrane receptor

MYB20

nucleic acid binding

carbohydrate transporter/ sugar porter

ATCUL3B/CUL3B

KUP6

SERK1 (SOMATIC EMBRYOGENESIS RECEPTOR-LIKE KINASE 1)

oxidoreductase/ oxidoreductase, acting on the CH-OH group of donors, NAD or NADP as acceptor

ATFX/GER1

acyltransferase/ carboxylic ester hydrolase/ lipase

CPK29

ATP binding / kinase/ protein kinase/ protein serine/threonine kinase/ protein-tyrosine kinase

protein binding / ubiquitin-protein ligase/ zinc ion binding

ADH1 (ALCOHOL DEHYDROGENASE 1)

catalytic

|                                                                                                            |
|------------------------------------------------------------------------------------------------------------|
| DNA binding / transcription factor                                                                         |
| VHA-A                                                                                                      |
| transcription regulator                                                                                    |
| RIE1 (RING-FINGER PROTEIN FOR EMBRYOGENESIS)                                                               |
| ATPTR2-B (NITRATE TRANSPORTER 1)                                                                           |
| ATP binding / protein kinase/ protein serine/threonine kinase                                              |
| OPR3                                                                                                       |
| Arabidopsis thaliana chromosome 2 clone T12H3 map ve013, complete sequence                                 |
| Arabidopsis thaliana chromosome 2 clone T12J2 map mi421, complete sequence                                 |
| Arabidopsis thaliana chromosome 2 BAC F23H14 genomic sequence,complete sequence                            |
| Arabidopsis thaliana chromosome 2 clone F7E22 map mi421, complete sequence                                 |
| Arabidopsis thaliana chromosome 2 clone T24I21 map mi398, complete sequence                                |
| ERD7 (EARLY-RESPONSIVE TO DEHYDRATION 7)                                                                   |
| signal recognition particle binding                                                                        |
| ATP binding / kinase/ protein kinase/ protein serine/threonine kinase                                      |
| N-acetyltransferase                                                                                        |
| AGP17 (ARABINO GALACTAN PROTEIN 17)                                                                        |
| NRAMP3                                                                                                     |
| ATP binding / protein kinase/ protein serine/threonine kinase/ protein-tyrosine kinase                     |
| EMB1997                                                                                                    |
| ATP binding / kinase/ protein kinase/ protein serine/threonine kinase/ protein-tyrosine kinase             |
| CYP707A2                                                                                                   |
| CIPK11                                                                                                     |
| DNA binding / transcription factor                                                                         |
| hydrolase/ inositol or phosphatidylinositol phosphatase                                                    |
| hydrolase, hydrolyzing O-glycosyl compounds                                                                |
| L-tyrosine transporter                                                                                     |
| structural constituent of ribosome / transcription initiation factor/ transcriptional elongation regulator |
| ATEYA                                                                                                      |
| ATORC2 (ORIGIN RECOGNITION COMPLEX SECOND LARGEST SUBUNIT)                                                 |
| amino acid transporter/ uracil transporter                                                                 |
| ATMAK3                                                                                                     |
| PSRP4 (PLASTID-SPECIFIC RIBOSOMAL PROTEIN 4)                                                               |
| peptidyl-prolyl cis-trans isomerase                                                                        |
| nutrient reservoir                                                                                         |
| catalytic/ hydrolase                                                                                       |
| LCR51                                                                                                      |
| peroxidase                                                                                                 |
| AT-HSFB3                                                                                                   |
| transcription factor                                                                                       |
| ATP binding / kinase/ protein kinase/ protein serine/threonine kinase/ protein-tyrosine kinase             |
| chitin binding / chitinase                                                                                 |
| Arabidopsis thaliana N-myristoyltransferase-like protein 2 mRNA, complete cds                              |
| GOS12 (GOLGI SNARE 12)                                                                                     |



|                                                                                             |
|---------------------------------------------------------------------------------------------|
| transketolase                                                                               |
| GAE4 (UDP-D-GLUCURONATE 4-EPIMERASE 4)                                                      |
| JAR1 (JASMONATE RESISTANT 1)                                                                |
| PLDP2                                                                                       |
| water channel                                                                               |
| beta-fructofuranosidase                                                                     |
| ATGSL10 (GLUCAN SYNTHASE-LIKE 10)                                                           |
| ammonia ligase/ ammonia-lyase                                                               |
| transcription factor                                                                        |
| ATP binding / aspartate-tRNA ligase/ lysine-tRNA ligase/ nucleic acid binding / tRNA ligase |
| ATP binding / DNA binding / DNA topoisomerase (ATP-hydrolyzing)                             |
| PAP1 (PHYTOCHROME-ASSOCIATED PROTEIN 1)                                                     |
| ATMKK5 (MITOGEN-ACTIVATED PROTEIN KINASE KINASE 5)                                          |
| TOPII (TOPOISOMERASE II)                                                                    |
| Arabidopsis thaliana DNA chromosome 5, BAC clone F7J8 (ESSA project)                        |
| guanyl-nucleotide exchange factor                                                           |
| kinase                                                                                      |
| kinase                                                                                      |
| unknown protein                                                                             |
| UDP-glycosyltransferase/ transferase, transferring glycosyl groups                          |
| ASN1 (DARK INDUCIBLE 6)                                                                     |
| ATATH2                                                                                      |
| SCPL37                                                                                      |
| SYP122                                                                                      |
| inorganic diphosphatase/ magnesium ion binding / pyrophosphatase                            |
| ubiquitin-protein ligase                                                                    |
| AREB3 (ABA-RESPONSIVE ELEMENT BINDING PROTEIN 3)                                            |
| CPK32                                                                                       |
| DNA binding / transcription factor                                                          |
| NRPA1                                                                                       |
| protein binding / structural constituent of ribosome                                        |
| unknown protein                                                                             |
| GBF2 (G-BOX BINDING FACTOR 2)                                                               |
| protein binding                                                                             |
| EZA1                                                                                        |
| DNA binding / transcription factor                                                          |
| RHA1B                                                                                       |
| ATPase                                                                                      |
| signal transducer                                                                           |
| unknown protein                                                                             |
| glycine hydroxymethyltransferase                                                            |
| transferase                                                                                 |
| AMP-activated protein kinase                                                                |
| ATP binding / nucleoside-triphosphatase/ nucleotide binding / transmembrane receptor        |

|                                                                                                                          |
|--------------------------------------------------------------------------------------------------------------------------|
| transcription factor                                                                                                     |
| formyltetrahydrofolate deformylase/ hydroxymethyl-, formyl- and related transferase                                      |
| unknown protein                                                                                                          |
| SHD (SHEPHERD)                                                                                                           |
| unknown protein                                                                                                          |
| ATP binding / protein kinase/ protein serine/threonine kinase/ protein-tyrosine kinase                                   |
| cytidine deaminase/ hydrolase/ zinc ion binding                                                                          |
| MGD1 (MONOGALACTOSYLDIACYLGLYCEROL SYNTHASE 1)                                                                           |
| BGAL11                                                                                                                   |
| RHA3B                                                                                                                    |
| HMGB5 (HIGH MOBILITY GROUP B 5)                                                                                          |
| SKS15                                                                                                                    |
| CIPK15 (CBL-INTERACTING PROTEIN KINASE 15)                                                                               |
| Arabidopsis thaliana DNA chromosome 5, BAC clone T1E22 (ESSA project)                                                    |
| unknown protein                                                                                                          |
| iron ion binding / isopenicillin-N synthase                                                                              |
| PMSR3 (PEPTIDEMETHIONINE SULFOXIDE REDUCTASE 3)                                                                          |
| FMN binding / NADH dehydrogenase (ubiquinone)/ iron ion binding                                                          |
| kinase                                                                                                                   |
| CYCD4                                                                                                                    |
| CPK7 (CALMODULIN-DOMAIN PROTEIN KINASE 7)                                                                                |
| AAC2                                                                                                                     |
| DEL2/E2FD/E2L1                                                                                                           |
| XPO1A                                                                                                                    |
| ATGSTF12 (GLUTATHIONE S-TRANSFERASE 26)                                                                                  |
| calcium:sodium antiporter/ cation:cation antiporter                                                                      |
| peroxidase                                                                                                               |
| unknown protein                                                                                                          |
| microtubule motor                                                                                                        |
| unknown protein                                                                                                          |
| ATP binding / ATP-dependent helicase/ RNA binding / double-stranded RNA binding / helicase/ nucleic acid binding / ribon |
| ATRAD51                                                                                                                  |
| ANAC089                                                                                                                  |
| unknown protein                                                                                                          |
| catalytic/ protein phosphatase type 2C                                                                                   |
| ATARLA1A                                                                                                                 |
| protein prenyltransferase                                                                                                |
| AZF3 (ARABIDOPSIS ZINC-FINGER PROTEIN 3)                                                                                 |
| PHT6                                                                                                                     |
| protein binding / transporter                                                                                            |
| hydrolase                                                                                                                |
| ATPK5                                                                                                                    |
| protein binding / signal transducer                                                                                      |
| COR78 (COLD REGULATED 78)                                                                                                |

|                                                                                                        |
|--------------------------------------------------------------------------------------------------------|
| calcium-transporting ATPase/ calmodulin binding                                                        |
| unknown protein                                                                                        |
| O-methyltransferase                                                                                    |
| 1-aminocyclopropane-1-carboxylate synthase/ transaminase/ transferase, transferring nitrogenous groups |
| transferase, transferring glycosyl groups                                                              |
| ATP binding / kinase/ protein kinase/ protein serine/threonine kinase/ protein-tyrosine kinase         |
| DFL1 (DWARF IN LIGHT 1)                                                                                |
| acyltransferase                                                                                        |
| acyltransferase                                                                                        |
| unknown protein                                                                                        |
| copper ion binding / electron transporter                                                              |
| phosphoinositide phospholipase C/ phospholipase C                                                      |
| ATUCP2 (UNCOUPLING PROTEIN 2)                                                                          |
| peptidase/ subtilase                                                                                   |
| ATATH15                                                                                                |
| PRH75                                                                                                  |
| ATHDH (HISTIDINOL DEHYDROGENASE)                                                                       |
| MLO10                                                                                                  |
| alpha-mannosidase                                                                                      |
| unknown protein                                                                                        |
| structural constituent of ribosome                                                                     |
| CYP71B5 (CYTOCHROME P450 71B5)                                                                         |
| unknown protein                                                                                        |
| UDP-glycosyltransferase/ transferase, transferring glycosyl groups                                     |
| carboxylic ester hydrolase/ hydrolase, acting on ester bonds / lipase                                  |
| S-adenosylmethionine-dependent methyltransferase                                                       |
| unknown protein                                                                                        |
| PMSR1 (PEPTIDEMETHIONINE SULFOXIDE REDUCTASE 1)                                                        |
| DNA binding                                                                                            |
| unknown protein                                                                                        |
| carboxylic ester hydrolase/ hydrolase, acting on ester bonds                                           |
| CYP705A6                                                                                               |
| unknown protein                                                                                        |
| unknown protein                                                                                        |
| unknown protein                                                                                        |
| unknown protein                                                                                        |
| SYP73 (SYNTAXIN OF PLANTS 73)                                                                          |
| unknown protein                                                                                        |
| DNA binding / transcription factor                                                                     |
| nucleic acid binding / rhodopsin-like receptor/ zinc ion binding                                       |
| unknown protein                                                                                        |
| transcription regulator                                                                                |
| unknown protein                                                                                        |
| unknown protein                                                                                        |

|                                                                                      |
|--------------------------------------------------------------------------------------|
| protein binding / zinc ion binding                                                   |
| monovalent cation:proton antiporter                                                  |
| RNA binding / nucleic acid binding                                                   |
| unknown protein                                                                      |
| unknown protein                                                                      |
| PAK                                                                                  |
| unknown protein                                                                      |
| DNA binding / transcription factor                                                   |
| transferase, transferring glycosyl groups / transferase, transferring hexosyl groups |
| unknown protein                                                                      |
| virion binding                                                                       |
| unknown protein                                                                      |
| protein binding / ubiquitin-protein ligase/ zinc ion binding                         |
| unknown protein                                                                      |
| unknown protein                                                                      |
| 4-coumarate-CoA ligase                                                               |
| unknown protein                                                                      |
| RNA binding / RNA-directed DNA polymerase                                            |
| unknown protein                                                                      |
| unknown protein                                                                      |
| electron transporter/ thiol-disulfide exchange intermediate                          |
| unknown protein                                                                      |
| hydrolase                                                                            |
| acyltransferase                                                                      |
| acyltransferase                                                                      |
| TT1 (TRANSPARENT TESTA 1)                                                            |
| protein binding / zinc ion binding                                                   |
| unknown protein                                                                      |
| kinase                                                                               |
| unknown protein                                                                      |

|                                                                                                |
|------------------------------------------------------------------------------------------------|
| LCR66/PDF2.4                                                                                   |
| nucleotide binding                                                                             |
| unknown protein                                                                                |
| unknown protein                                                                                |
| catalytic/ hydrolase                                                                           |
| transcription regulator                                                                        |
| unknown protein                                                                                |
| catalytic                                                                                      |
| unknown protein                                                                                |
| unknown protein                                                                                |
| cation transporter                                                                             |
| ANAC058                                                                                        |
| UBC19                                                                                          |
| ATP binding / kinase/ protein serine/threonine kinase                                          |
| ATP binding / kinase/ protein kinase/ protein serine/threonine kinase/ protein-tyrosine kinase |
| ATECP31                                                                                        |
| ATVAMP728                                                                                      |
| cysteine-type peptidase                                                                        |
| nucleotide binding                                                                             |
| unknown protein                                                                                |
| transporter                                                                                    |
| transporter                                                                                    |
| unknown protein                                                                                |
| lipid binding                                                                                  |
| protein binding                                                                                |
| unknown protein                                                                                |
| unknown protein                                                                                |
| unknown protein                                                                                |
| unknown protein                                                                                |
| heat shock protein binding / unfolded protein binding                                          |
| ATBS14A                                                                                        |
| unknown protein                                                                                |
| unknown protein                                                                                |
| TXR1 (THAXTOMIN A RESISTANT 1)                                                                 |
| unknown protein                                                                                |
| protein binding / ubiquitin-protein ligase/ zinc ion binding                                   |
| DNA binding / transcription factor                                                             |
| protein binding / ubiquitin-protein ligase/ zinc ion binding                                   |
| unknown protein                                                                                |
| unknown protein                                                                                |

|                                                                         |
|-------------------------------------------------------------------------|
| unknown protein                                                         |
| SULTR1                                                                  |
| unknown protein                                                         |
| MYB42                                                                   |
| unknown protein                                                         |
| unknown protein                                                         |
| RNA polymerase II transcription factor/ transcription initiation factor |
| oxidoreductase                                                          |
| unknown protein                                                         |
| unknown protein                                                         |
| hydrolase/ protein serine/threonine phosphatase                         |
| unknown protein                                                         |
| calcium ion binding                                                     |
| unknown protein                                                         |
| RIC7 (ROP-INTERACTIVE CRIB MOTIF-CONTAINING PROTEIN 7)                  |
| protein binding / ubiquitin-protein ligase/ zinc ion binding            |
| protein binding / ubiquitin-protein ligase/ zinc ion binding            |
| catalytic                                                               |
| unknown protein                                                         |
| unknown protein                                                         |
| protein binding                                                         |
| unknown protein                                                         |
| KCS2                                                                    |
| unknown protein                                                         |
| ATP binding                                                             |
| DNA binding                                                             |
| structural constituent of ribosome                                      |
| protein binding / ubiquitin-protein ligase/ zinc ion binding            |
| unknown protein                                                         |
| unknown protein                                                         |
| HAT14                                                                   |
| nucleic acid binding                                                    |
| organic anion transporter                                               |
| ATP binding / protein kinase                                            |
| unknown protein                                                         |
| AGP15 (ARABINOGALACTAN PROTEIN 15)                                      |
| unknown protein                                                         |
| unknown protein                                                         |
| transferase                                                             |
| unknown protein                                                         |
| unknown protein                                                         |
| ATBPM1                                                                  |
| unknown protein                                                         |
| unknown protein                                                         |

unknown protein

unknown protein

unknown protein

unknown protein

unknown protein

Arabidopsis thaliana BAC F4I4

nucleic acid binding

unknown protein

transcription factor

unknown protein

protein binding

WOX8

enzyme inhibitor/ pectinesterase/ pectinesterase inhibitor

unknown protein

transcription factor/ zinc ion binding

unknown protein

unknown protein

enzyme inhibitor/ pectinesterase/ pectinesterase inhibitor

unknown protein

copper ion binding

unknown protein

unknown protein

unknown protein

protein translocase/ protein transporter

unknown protein

catalytic/ hydrolase

DNA binding / transcription factor

cysteine-type peptidase

unknown protein

|                                       |
|---------------------------------------|
| unknown protein                       |
| unknown protein                       |
| unknown protein                       |
| unknown protein                       |
| CYP705A18                             |
| unknown protein                       |
| RALFL26 (RALF-LIKE 26)                |
| ATGA2OX3                              |
| unknown protein                       |
| DNA binding / transcription factor    |
| unknown protein                       |
| amino acid permease                   |
| nucleotide binding                    |
| unknown protein                       |
| EMB2219                               |
| unknown protein                       |
| unknown protein                       |
| protein binding                       |
| unknown protein                       |
| unknown protein                       |
| unknown protein                       |
| catalytic/ phosphoprotein phosphatase |
| unknown protein                       |



|                                                                         |
|-------------------------------------------------------------------------|
| monovalent cation:proton antiporter                                     |
| unknown protein                                                         |
| transcription factor                                                    |
| unknown protein                                                         |
| unknown protein                                                         |
| protein binding / zinc ion binding                                      |
| unknown protein                                                         |
| unknown protein                                                         |
| transcription factor                                                    |
| unknown protein                                                         |
| unknown protein                                                         |
| Arabidopsis thaliana genomic DNA, chromosome 3, BAC clone:F11I2         |
| Arabidopsis thaliana genomic DNA, chromosome 3, BAC clone:F8N14         |
| unknown protein                                                         |
| calmodulin binding                                                      |
| unknown protein                                                         |
| unknown protein                                                         |
| protein binding                                                         |
| unknown protein                                                         |
| unknown protein                                                         |
| Arabidopsis thaliana DNA chromosome 4, ESSA I FCA contig fragment No. 4 |
| unknown protein                                                         |
| transcription factor                                                    |
| unknown protein                                                         |
| unknown protein                                                         |
| unknown protein                                                         |
| unknown protein                                                         |

r binding







release III

















| Custom ID            | Gene Symbol | Gene_ID                   | Accession   | Control      |
|----------------------|-------------|---------------------------|-------------|--------------|
| obsarabidopsis#00049 | AT2G04025   | 814929                    | NM_126438.2 | 0.217099994  |
| obsarabidopsis#00122 | AT2G20616   | 816587///816612           | NM_127624.1 | 1.040099978  |
| obsarabidopsis#00276 | AT1G02460   | 839443                    | NM_100127.2 | -0.243399993 |
| obsarabidopsis#00280 | BXL2        | 837940                    | NM_100144.2 | -2.997400045 |
| obsarabidopsis#00283 | PGA4        | 839391                    | NM_100158.1 | -0.278499991 |
| obsarabidopsis#00284 | ATCEL2      | 839385                    | NM_100159.2 | -1.460199952 |
| obsarabidopsis#00310 | AT1G03590   | 839447                    | NM_100239.3 | 0.215200007  |
| obsarabidopsis#00362 | AT1G05170   | 839292                    | NM_100395.1 | 1.137500048  |
| obsarabidopsis#00479 | EMB2284     |                           | NM_100699.1 | 0.717000008  |
| obsarabidopsis#00499 | AT1G08920   | 837413                    | NM_100764.2 | 0.853299975  |
| obsarabidopsis#00504 | ATRBOHB     | 837430                    | NM_100780.3 | 0.731899977  |
| obsarabidopsis#00515 | AT1G09380   | 837460                    | NM_100808.2 | -1.762599945 |
| obsarabidopsis#00516 | AT1G09390   | 837461                    | NM_100809.3 | 0.126499996  |
| obsarabidopsis#00517 | G6PD4       | 837465                    | NM_100813.1 | 0.523299992  |
| obsarabidopsis#00620 | AT1G11710   | 837715                    | NM_101043.2 | 8.269000053  |
| obsarabidopsis#00687 | AT1G13640   | 837925                    | NM_101234.2 | 0.336499989  |
| obsarabidopsis#00695 | AT1G14020   | 837963                    | NM_101268.2 | 1.032199979  |
| obsarabidopsis#00728 | RDR1        | 838044                    | NM_101348.2 | -0.529299974 |
| obsarabidopsis#00757 | LHCB6       | 838151                    | NM_101450.3 | 16.94009972  |
| obsarabidopsis#00891 | AT1G19700   | 838558                    | NM_101826.1 | 1.524600029  |
| obsarabidopsis#00987 | AT1G22810   | 838887                    | NM_102128.2 | 1.164800048  |
| obsarabidopsis#00992 | AT1G22960   | 838903                    | NM_102143.1 | 0.358200014  |
| obsarabidopsis#01001 | GGT1        | 838940                    | NM_102180.2 | 9.850999832  |
| obsarabidopsis#01026 | AT1G24020   | 839014                    | NM_102249.3 | 1.063500047  |
| obsarabidopsis#01139 | AT1G28450   |                           | NM_102613.1 | 3.369100094  |
| obsarabidopsis#01156 | AT1G29380   |                           | NM_102677.2 | 0.077        |
| obsarabidopsis#01166 | AT1G29660   | 839843                    | NM_102706.1 | 0.153200001  |
| obsarabidopsis#01169 | AT1G29740   |                           | NM_102714.2 | 3.576200008  |
| obsarabidopsis#01176 | AT1G29960   | 2745760///5007741///83974 | NM_102736.1 | 1.137500048  |
| obsarabidopsis#01215 | UFO         | 839982                    | NM_102834.1 | 0.276300013  |
| obsarabidopsis#01407 |             |                           | AC073433.9  | -0.052299999 |
| obsarabidopsis#01542 | AT1G49900   | 841413                    | NM_103877.3 | 0.453799993  |
| obsarabidopsis#01554 | VIIIA       | 841458                    | NM_103919.2 | 0.530700028  |
| obsarabidopsis#01599 | 4CL1        | 841593                    | NM_104046.2 | 1.502900004  |
| obsarabidopsis#01623 | AT1G52070   | 841636                    | NM_104088.2 | 0.7852       |
| obsarabidopsis#01644 | AT1G52660   | 841698                    | NM_104144.1 | 0.717000008  |
| obsarabidopsis#01672 | AT1G53140   | 841748                    | NM_104193.3 | 0.241300002  |
| obsarabidopsis#01783 | AT1G56670   | 842122                    | NM_104543.2 | 1.232200027  |
| obsarabidopsis#01861 | AT1G60470   | 842342                    | NM_104734.2 | 15.54500008  |
| obsarabidopsis#01884 | AT1G61100   | 842403                    | NM_104791.2 | -0.385500014 |
| obsarabidopsis#01922 | AT1G62170   | 842513                    | NM_104898.1 | 0.0579       |
| obsarabidopsis#01956 | NRPD1a      |                           | NM_104980.2 | 5.311299801  |
| obsarabidopsis#02003 | AT1G64390   | 842747                    | NM_105114.2 | 3.764300108  |

|                      |           |                  |             |              |
|----------------------|-----------|------------------|-------------|--------------|
| obsarabidopsis#02089 | AT1G66800 | 842998           | NM_105351.2 | 3.334300041  |
| obsarabidopsis#02139 | AT-HSFA8  |                  | NM_105467.3 | -0.396699995 |
| obsarabidopsis#02141 | ATPIS1    | 843128           | NM_105470.1 | -0.514100015 |
| obsarabidopsis#02171 | ATPPC4    | 843206           | NM_105548.4 | 1.588799953  |
| obsarabidopsis#02340 | AT1G72870 | 843618           | NM_105945.2 | 0.127499998  |
| obsarabidopsis#02369 | AT1G73600 | 6241275///843694 | NM_106018.3 | 9.836600304  |
| obsarabidopsis#02472 | AT1G75880 | 843921           | NM_106238.2 | 1.040099978  |
| obsarabidopsis#02477 | EXL6      | 843926           | NM_106243.2 | 0.028899999  |
| obsarabidopsis#02543 | AT1G77670 | 844103           | NM_106416.1 | 0.511099994  |
| obsarabidopsis#02605 | AT1G79040 | 844245           | NM_106555.2 | 14.64000034  |
| obsarabidopsis#02648 | TMM       | 844348           | NM_106657.2 | 1.502900004  |
| obsarabidopsis#02654 | AT1G80310 | 844371           | NM_106680.3 | 9.498200417  |
| obsarabidopsis#02761 | ARPN      | 814816           | NM_126340.1 | 5.459400177  |
| obsarabidopsis#02790 | CDC48B    | 814895           | NM_126415.4 | 0.468199998  |
| obsarabidopsis#02828 | AT2G04650 | 815007           | NM_126494.4 | 13.43700027  |
| obsarabidopsis#02871 |           |                  | AC005970.3  | 0.608600002  |
| obsarabidopsis#02884 |           |                  | AC006918.9  | -0.353599995 |
| obsarabidopsis#02928 | AT2G07690 | 815415           | NM_126771.3 | 0.164900005  |
| obsarabidopsis#02935 | AT3G30550 |                  | NM_113956.1 | 0.837400019  |
| obsarabidopsis#03055 |           |                  | AC005396.3  | -0.999199986 |
| obsarabidopsis#03094 |           |                  | AC007134.10 | 0.215200007  |
| obsarabidopsis#03213 | HB-2      | 816370           | NM_127411.1 | 1.437000036  |
| obsarabidopsis#03456 | PDE319    |                  | NM_127973.2 | -1.283499956 |
| obsarabidopsis#03492 | AT2G24840 | 817021           | NM_179727.1 | 2.696099997  |
| obsarabidopsis#03511 | CESA10    | 817092           | NM_128111.2 | 0.215200007  |
| obsarabidopsis#03579 | AT2G26940 | 817235           | NM_128251.1 | 1.131000042  |
| obsarabidopsis#03584 | PAG1      | 817244           | NM_128260.3 | 2.770400047  |
| obsarabidopsis#03668 | AT2G28970 | 817446           | NM_128456.1 | 0.650600016  |
| obsarabidopsis#03672 | AT2G29060 | 817454           | NM_128463.2 | 0.717000008  |
| obsarabidopsis#03680 | AT2G29140 | 817463///817469  | NM_128471.1 | 0.567600012  |
| obsarabidopsis#03707 | AT2G29870 |                  | NM_128541.1 | 0.837400019  |
| obsarabidopsis#03743 | AT2G30570 | 817606           | NM_128609.3 | 9.105199814  |
| obsarabidopsis#03772 | ATERF15   | 817680           | NM_179831.1 | 3.294300079  |
| obsarabidopsis#03899 | AT2G34080 | 817969           | NM_128959.2 | 1.024399996  |
| obsarabidopsis#04001 | AT2G36690 | 818241           | NM_129224.2 | 0.511099994  |
| obsarabidopsis#04044 | AT2G37590 | 818336           | NM_129315.2 | -0.044399999 |
| obsarabidopsis#04103 | AT2G39040 | 818490           | NM_129461.1 | 0.276300013  |
| obsarabidopsis#04148 | LHCB4.3   | 818599           | NM_129568.2 | 2.990600109  |
| obsarabidopsis#04156 | AT2G40250 | 818617           | NM_129583.1 | -0.499199986 |
| obsarabidopsis#04228 | AT2G41820 | 818781           | NM_129746.2 | 0.215200007  |
| obsarabidopsis#04323 | AT2G43850 | 818989           | NM_129947.3 | 0.025599999  |
| obsarabidopsis#04375 | AT2G45120 | 819119           | NM_130075.3 | 1.988199949  |
| obsarabidopsis#04520 | AT3G01270 | 821142           | NM_110993.2 | 1.610000014  |
| obsarabidopsis#04556 | AT3G02270 | 821200           | NM_111094.1 | -0.174199998 |

|                      |           |        |             |              |
|----------------------|-----------|--------|-------------|--------------|
| obsarabidopsis#04667 | AT3G04970 | 819657 | NM_111369.3 | 0.567600012  |
| obsarabidopsis#04736 | AT3G06690 |        | NM_111549.1 | 0.7852       |
| obsarabidopsis#04771 | AT3G07670 | 819958 | NM_111646.2 | 0.99059999   |
| obsarabidopsis#04808 | RGP3      | 820039 | NM_111724.2 | 0.064300001  |
| obsarabidopsis#04876 | AT3G10550 | 820220 | NM_111891.3 | -0.990700006 |
| obsarabidopsis#04970 | AT3G13050 | 820491 | NM_112142.3 | 0.474099994  |
| obsarabidopsis#05129 | AT3G19800 | 821517 | NM_112870.3 | 2.575299978  |
| obsarabidopsis#05248 | AT3G43190 | 823393 | NM_114187.3 | 2.231400013  |
| obsarabidopsis#05324 | ATHRS1    | 823753 | NM_114479.3 | 2.018399954  |
| obsarabidopsis#05372 | AT3G47400 | 823894 | NM_114608.2 | 0.684800029  |
| obsarabidopsis#05386 | ATATH5    |        | NM_114645.2 | -1.444000006 |
| obsarabidopsis#05701 | AT3G57340 | 824901 | NM_115594.2 | 1.835399985  |
| obsarabidopsis#05758 | OASC      | 825145 | NM_115838.3 | -0.243399993 |
| obsarabidopsis#05778 | AT3G60330 | 825204 | NM_115897.1 | 1.775200009  |
| obsarabidopsis#05831 | GLP10     | 825375 | NM_116067.2 | 2.140500069  |
| obsarabidopsis#05880 | CRCK2     | 828125 | NM_116255.3 | 0.352299988  |
| obsarabidopsis#05914 | MSH6      | 828147 | NM_116438.1 | 0.184200004  |
| obsarabidopsis#05976 | AT4G05180 | 825866 | NM_116757.3 | 9.91629982   |
| obsarabidopsis#06026 | AT4G08850 | 826456 | NM_179207.1 | -0.571500003 |
| obsarabidopsis#06040 | AT4G09650 | 826551 | NM_117033.2 | 9.705699921  |
| obsarabidopsis#06080 | AT4G11380 | 826741 | NM_117209.3 | -0.052299999 |
| obsarabidopsis#06116 | SCPL20    |        | NM_117360.3 | 0.038699999  |
| obsarabidopsis#06141 | AT4G13920 |        | NM_117466.2 | -0.340000004 |
| obsarabidopsis#06151 | AT4G14160 | 827055 | NM_117493.3 | 1.232200027  |
| obsarabidopsis#06253 | AT4G16600 | 827361 | NM_117761.1 | -0.367900014 |
| obsarabidopsis#06279 | AT4G16990 | 827407 | NM_117803.3 | 3.881200075  |
| obsarabidopsis#06375 | AT4G20160 | 827762 | NM_118135.1 | 0.748899996  |
| obsarabidopsis#06379 | AT4G20230 | 827770 | NM_118142.2 | -1.147600055 |
| obsarabidopsis#06485 | AT4G23300 | 828429 | NM_118459.3 | 6.785699844  |
| obsarabidopsis#06536 | SKS1      | 828627 | NM_118656.3 | -0.078699999 |
| obsarabidopsis#06601 | FEY       | 828890 | NM_118915.4 | 2.18479991   |
| obsarabidopsis#06749 | GAMMA-VPE | 829431 | NM_119448.3 | 10.17240047  |
| obsarabidopsis#06840 | AT4G36210 | 829778 | NM_179174.2 | 1.015499949  |
| obsarabidopsis#07121 | UGT76C1   |        | NM_120669.3 | 1.712100029  |
| obsarabidopsis#07145 | AT5G06580 | 830546 | NM_120741.2 | 5.173099995  |
| obsarabidopsis#07171 | AT5G07040 | 830595 | NM_120786.1 | 1.161399961  |
| obsarabidopsis#07230 | AT5G08390 | 830737 | NM_120923.1 | 12.91819954  |
| obsarabidopsis#07425 | AT5G14760 | 831328 | NM_121480.2 | 0.870800018  |
| obsarabidopsis#07464 | PAM1      | 831450 | NM_121598.2 | 0.863399982  |
| obsarabidopsis#07483 | IPP1      | 831505 | NM_121649.4 | -0.533500016 |
| obsarabidopsis#07511 | AT5G17310 | 831596 | NM_121737.2 | -0.571500003 |
| obsarabidopsis#07677 | NIT4      |        | NM_122135.3 | 6.150000095  |
| obsarabidopsis#07884 |           |        | AB046432.1  | 0.539499998  |
| obsarabidopsis#08020 | AT5G39390 | 833935 | NM_123301.1 | -0.635299981 |



|                      |           |                  |             |              |
|----------------------|-----------|------------------|-------------|--------------|
| obsarabidopsis#08206 | PDF1.2    | 834469           | NM_123809.3 | 4.440999985  |
| obsarabidopsis#08219 | AT5G44830 | 834513///834514  | NM_123851.1 | -0.690199971 |
| obsarabidopsis#08243 | AT5G45640 | 834604           | NM_123932.2 | 2.913700104  |
| obsarabidopsis#08288 | AT5G46540 | 834697           | NM_124024.1 | 1.972000003  |
| obsarabidopsis#08374 | SAD1      | 834945           | NM_124264.2 | 1.974699974  |
| obsarabidopsis#08420 | AT5G50180 | 835083           | NM_124397.3 | 0.553099999  |
| obsarabidopsis#08504 | AT5G52850 | 835362           | NM_124663.1 | 4.817200184  |
| obsarabidopsis#08608 | AT5G55740 | 835668           | NM_124956.1 | -0.007       |
| obsarabidopsis#08635 | ILL1      | 835766///835767  | NM_125048.1 | 0.940199971  |
| obsarabidopsis#08675 | AT5G57660 | 835872           | NM_125149.2 | -0.760599971 |
| obsarabidopsis#08772 | AT5G59580 | 836077           | NM_125350.2 | -1.340800047 |
| obsarabidopsis#08780 | HSP18.2   | 836093           | NM_125364.1 | -1.327800035 |
| obsarabidopsis#08854 | AT5G61520 | 836273           | NM_125545.3 | 2.666699886  |
| obsarabidopsis#09039 | AT5G66190 | 836751           | NM_126017.4 | 11.32999992  |
| obsarabidopsis#09078 | AT5G67010 | 836836           | NM_126101.1 | 0.88410002   |
| obsarabidopsis#09328 | GRF4      |                  | NM_103213.2 | 0.586499989  |
| obsarabidopsis#09431 | AT4G12600 | 826873           | NM_117330.2 | 4.061299801  |
| obsarabidopsis#09442 | AT5G59590 | 836078           | NM_125351.2 | 1.208999991  |
| obsarabidopsis#09521 | AT3G46080 |                  | NM_114477.1 | 4.700099945  |
| obsarabidopsis#09635 | AT2G12700 |                  | NM_126897.1 | 6.870299816  |
| obsarabidopsis#09689 | AT2G36180 | 818190           | NM_129176.1 | 3.283799887  |
| obsarabidopsis#09691 | AT1G26240 | 839165           | NM_102388.1 | 0.395700008  |
| obsarabidopsis#09920 | AT3G63060 | 825481           | NM_116171.2 | -0.106299996 |
| obsarabidopsis#10112 | AT3G48200 | 823977           | NM_114690.2 | 3.951600075  |
| obsarabidopsis#10140 | AT4G35220 | 829675           | NM_119688.2 | 0.025900001  |
| obsarabidopsis#10179 | AT4G21910 | 6241480///828280 | NM_118312.2 | 0.772099972  |
| obsarabidopsis#10275 | AT1G02570 | 839485           | NM_100138.1 | -0.158999994 |
| obsarabidopsis#10338 | AT1G03670 |                  | NM_100246.1 | 1.370100021  |
| obsarabidopsis#10347 | AT1G03790 | 839408           | NM_100258.2 | 2.699800014  |
| obsarabidopsis#10600 | AT1G09070 | 837428           | NM_100778.2 | 20.53070068  |
| obsarabidopsis#10684 | AT1G10770 | 837620           | NM_100953.2 | -0.172600001 |
| obsarabidopsis#10719 | AT1G11560 | 837699           | NM_101029.1 | 1.392400026  |
| obsarabidopsis#10816 | AT1G13520 |                  | NM_101222.2 | 0.630500019  |
| obsarabidopsis#10845 | AT1G13940 | 837954           | NM_101260.2 | 3.677299976  |
| obsarabidopsis#10853 | AT1G14150 | 837974           | NM_101280.2 | 5.734000206  |
| obsarabidopsis#10966 | WAKL5     | 838185           | NM_101483.1 | 8.863200188  |
| obsarabidopsis#10997 | AT1G16830 | 838254           | NM_101544.1 | 2.447000027  |
| obsarabidopsis#11016 | AT1G17270 |                  | NM_101588.3 | 0.037700001  |
| obsarabidopsis#11024 | AT1G17430 | 838315           | NM_101604.1 | 0.567600012  |
| obsarabidopsis#11058 | AT1G18300 |                  | NM_101688.2 | 0.602800012  |
| obsarabidopsis#11100 | AT1G19025 | 838484           | NM_101760.1 | -0.105300002 |
| obsarabidopsis#11210 | AT1G21065 | 838701           | NM_101960.2 | 11.16419983  |
| obsarabidopsis#11252 | AT1G21780 | 838782           | NM_102027.2 | -0.172600001 |
| obsarabidopsis#11268 | EMB2204   |                  | NM_102059.2 | 2.066499949  |

|                      |           |                 |             |              |
|----------------------|-----------|-----------------|-------------|--------------|
| obsarabidopsis#11280 | AT1G22250 |                 | NM_102075.3 | -0.940199971 |
| obsarabidopsis#11319 | AT1G23210 | 838930          | NM_102170.1 | -1.112100005 |
| obsarabidopsis#11359 | AT1G24130 |                 | NM_102259.1 | 0.381700009  |
| obsarabidopsis#11368 | AT1G24290 | 839045          | NM_102275.3 | -0.384900004 |
| obsarabidopsis#11448 | AT1G26840 | 839227          | NM_102448.2 | 1.433500051  |
| obsarabidopsis#11452 | AT1G26900 | 838376          | NM_102454.1 | 0.567600012  |
| obsarabidopsis#11491 | AT1G27550 | 839646          | NM_102519.1 | 0.837400019  |
| obsarabidopsis#11632 | AT1G30850 | 839969          | NM_102822.1 | 2.626699924  |
| obsarabidopsis#11638 | AT1G32010 | 833799///840092 | NM_102935.1 | 0.474099994  |
| obsarabidopsis#11761 | AT1G33811 | 840274          | NM_103101.3 | 6.473199844  |
| obsarabidopsis#11823 | AT1G35430 | 840435          | NM_103238.3 | 3.168299913  |
| obsarabidopsis#11836 | AT1G35820 | 840484          | NM_103282.1 | 0.695500016  |
| obsarabidopsis#12020 | AT1G47920 | 841210          | NM_103690.2 | 0.485500008  |
| obsarabidopsis#12130 | AT1G49980 | 841422          | NM_103886.3 | 11.56509972  |
| obsarabidopsis#12131 | AT1G49990 |                 | NM_103887.2 | 2.389800072  |
| obsarabidopsis#12374 | AT1G55240 | 841967          | NM_104397.2 | 0.863399982  |
| obsarabidopsis#12400 | AT1G55650 |                 | NM_104441.1 | 0.485500008  |
| obsarabidopsis#12410 | AT1G55820 | 842032          | NM_104459.1 | 1.262300014  |
| obsarabidopsis#12484 | ZF14      | 842203          | NM_104614.2 | 0.863399982  |
| obsarabidopsis#12519 | AT1G60200 | 842315          | NM_104710.3 | 2.707900047  |
| obsarabidopsis#12566 | AT1G61210 | 842414          | NM_104802.3 | -0.349400014 |
| obsarabidopsis#12700 | AT1G64030 | 842706          | NM_105076.1 | 2.085099936  |
| obsarabidopsis#12761 | AT1G65090 | 842817          | NM_105183.2 | -1.572000027 |
| obsarabidopsis#12771 | AT1G65200 |                 | NM_105193.1 | -0.458700001 |
| obsarabidopsis#12876 | AT1G67450 | 843065          | NM_105412.1 | 0.482600003  |
| obsarabidopsis#12883 | AT1G67570 | 843078          | NM_105424.3 | 1.631100059  |
| obsarabidopsis#12915 | AT1G68380 | 843167          | NM_105509.2 | 3.975399971  |
| obsarabidopsis#12972 | AT1G69630 | 843299          | NM_105631.1 | 1.289899945  |
| obsarabidopsis#12980 | WRKY36    | 843317          | NM_105649.1 | 0.274899989  |
| obsarabidopsis#13129 | AT1G73060 | 843637          | NM_105964.3 | 5.133100033  |
| obsarabidopsis#13359 | NADK3     |                 | NM_106506.2 | 1.073199987  |
| obsarabidopsis#13412 | AT1G79510 | 844289          | NM_106599.2 | 4.007599831  |
| obsarabidopsis#13533 | ATIPT8    | 821450          | NM_112803.1 | 3.676100016  |
| obsarabidopsis#13584 | CYP705A33 | 821646          | NM_112988.2 | 0.121699996  |
| obsarabidopsis#13592 | AT3G21340 | 821688          | NM_113029.2 | 1.239199996  |
| obsarabidopsis#13706 | SCPL21    |                 | NM_113438.1 | 0.575399995  |
| obsarabidopsis#13728 | AT3G26140 | 822214          | NM_113521.2 | 0.453799993  |
| obsarabidopsis#13800 | AT3G28740 | 822506          | NM_113795.2 | 1.991099954  |
| obsarabidopsis#13841 | AT3G32920 | 816468///823055 | NM_114061.1 | 2.539099932  |
| obsarabidopsis#13919 | AT3G43180 |                 | NM_114186.1 | -0.906899989 |
| obsarabidopsis#13938 | AT3G43440 |                 | NM_114212.3 | 1.468500018  |
| obsarabidopsis#14106 | AT3G47070 | 823860          | NM_114574.2 | 11.53880024  |
| obsarabidopsis#14258 | AT3G51340 |                 | NM_114993.1 | 15.56849957  |
| obsarabidopsis#14328 | AT3G51720 | 824335          | NM_115031.1 | 1.775200009  |

|                      |           |        |             |              |
|----------------------|-----------|--------|-------------|--------------|
| obsarabidopsis#14412 | AT3G53780 | 824545 | NM_115238.2 | 0.306499988  |
| obsarabidopsis#14433 | AT3G54200 | 824587 | NM_115280.2 | 1.433500051  |
| obsarabidopsis#14461 | AT3G54880 |        | NM_115345.2 | 24.10549927  |
| obsarabidopsis#14468 | AT3G55080 | 824674 | NM_115366.2 | 0.586499989  |
| obsarabidopsis#14472 | AT3G55250 | 824691 | NM_115383.2 | -0.2086      |
| obsarabidopsis#14514 | AT3G56160 | 824782 | NM_115474.2 | -1.283499956 |
| obsarabidopsis#14552 | AT3G56750 | 824842 | NM_115534.2 | 2.537699938  |
| obsarabidopsis#14616 | AT3G58000 | 824969 | NM_115662.1 | 1.113299966  |
| obsarabidopsis#14756 | AT3G59960 |        | NM_115859.1 | -1.76970005  |
| obsarabidopsis#14796 | AT3G60700 | 825241 | NM_115934.2 | -0.219400004 |
| obsarabidopsis#14831 | AT3G61280 |        | NM_115992.2 | -0.458700001 |
| obsarabidopsis#14872 | AT3G62000 | 825373 | NM_116065.2 | 1.775200009  |
| obsarabidopsis#14908 | AT3G62550 | 825429 | NM_116120.1 | 9.464900017  |
| obsarabidopsis#14929 | AT3G62970 | 825472 | NM_116162.4 | 7.42509985   |
| obsarabidopsis#14960 | AT3G63510 | 825526 | NM_116216.1 | 2.212899923  |
| obsarabidopsis#14994 | AT4G00940 | 827952 | NM_116321.3 | 7.273499966  |
| obsarabidopsis#15035 | AT4G01910 | 827105 | NM_116422.2 | -0.697399974 |
| obsarabidopsis#15071 | AT4G03010 | 828113 | NM_116535.1 | 0.089699998  |
| obsarabidopsis#15215 |           |        | AL161507.2  | -0.039900001 |
| obsarabidopsis#15271 | AT4G09870 |        | NM_117055.1 | 0.352800012  |
| obsarabidopsis#15296 | AT4G09430 | 826526 | NM_117011.1 | 0.3662       |
| obsarabidopsis#15440 | WRKY19    | 826810 | NM_117272.2 | -0.744700015 |
| obsarabidopsis#15460 | AT4G12360 | 826845 | NM_117306.2 | 0.567600012  |
| obsarabidopsis#15461 | AT4G12370 |        | NM_117307.1 | 1.089100003  |
| obsarabidopsis#15466 | AT4G12440 | 826856 | NM_117314.2 | -0.313899994 |
| obsarabidopsis#15550 | AT4G17040 | 827412 | NM_117808.2 | 10.18900013  |
| obsarabidopsis#15611 | AT4G18830 |        | NM_117999.4 | 4.595799923  |
| obsarabidopsis#15865 | AT4G24570 | 828559 | NM_118590.2 | 11.14319992  |
| obsarabidopsis#15908 | AT4G25410 | 828644 | NM_118673.2 | 21.4864006   |
| obsarabidopsis#16007 | AT4G27250 | 828833 | NM_118859.2 | 0.485500008  |
| obsarabidopsis#16146 | AT4G30390 | 829162 | NM_119185.2 | 17.13739967  |
| obsarabidopsis#16190 | AT4G31510 |        | NM_119300.2 | -1.998100042 |
| obsarabidopsis#16287 | AT4G33120 |        | NM_119466.2 | 2.920599937  |
| obsarabidopsis#16406 | AT4G35540 | 829706 | NM_119719.2 | 1.672899961  |
| obsarabidopsis#16450 | AT4G36530 | 829805 | NM_119816.3 | 7.508200169  |
| obsarabidopsis#16453 | AT4G36590 | 829811 | NM_119822.1 | 5.635900021  |
| obsarabidopsis#16492 | AT4G37620 |        | NM_119925.1 | 1.972000003  |
| obsarabidopsis#16543 | AT4G38790 |        | NM_120039.1 | 0.286900014  |
| obsarabidopsis#16563 | AT4G39110 | 830066 | NM_120071.1 | -0.697399974 |
| obsarabidopsis#16570 | AT4G39300 | 830086 | NM_120091.1 | 1.795400023  |
| obsarabidopsis#16751 | EIN2      | 831889 | NM_120406.3 | -0.484400004 |
| obsarabidopsis#16916 | AT5G06790 | 830569 | NM_120762.1 | 1.437000036  |
| obsarabidopsis#16920 | AT5G06930 | 830584 | NM_120775.2 | 0.0579       |
| obsarabidopsis#17084 | AT5G11240 | 830994 | NM_121162.3 | 11.07830048  |

|                      |           |                  |             |              |
|----------------------|-----------|------------------|-------------|--------------|
| obsarabidopsis#17123 | KEA6      | 831053           | NM_121218.3 | -0.425700009 |
| obsarabidopsis#17148 | AT5G12160 | 831090           | NM_121254.1 | 0.482600003  |
| obsarabidopsis#17187 | AT5G13150 | 831154           | NM_121318.1 | 1.161399961  |
| obsarabidopsis#17300 | AT5G15420 | 831394           | NM_121546.2 | -1.884500027 |
| obsarabidopsis#17394 | AT5G17270 | 831592           | NM_121733.1 | -1.009699941 |
| obsarabidopsis#17544 | AT5G20640 | 832187           | NM_122071.1 | -0.484400004 |
| obsarabidopsis#17698 | AT5G25570 | 832632           | NM_122468.2 | 0.837400019  |
| obsarabidopsis#17732 | AT5G26230 | 832692           | NM_122524.2 | -0.065399997 |
| obsarabidopsis#17736 | AT5G26300 |                  | NM_122531.1 | 0.164900005  |
| obsarabidopsis#17845 | AT5G28400 | 832916///832925  | NM_122723.1 | 19.62479973  |
| obsarabidopsis#18016 | AT5G37570 | 833735           | NM_123116.1 | 7.107299805  |
| obsarabidopsis#18156 | AT5G39930 | 833990           | NM_123356.1 | 1.113299966  |
| obsarabidopsis#18207 | AT5G40960 | 834098           | NM_123461.1 | -2.680999994 |
| obsarabidopsis#18236 | AT5G41520 | 834154           | NM_123516.2 | 2.613899946  |
| obsarabidopsis#18264 | AT5G42210 |                  | NM_123586.1 | -0.425700009 |
| obsarabidopsis#18266 | VAR1      | 834232           | NM_123592.2 | 7.321400166  |
| obsarabidopsis#18298 | AT5G43140 | 834331           | NM_123680.2 | 1.089100003  |
| obsarabidopsis#18339 | AT5G44220 |                  | NM_123789.1 | 0.121699996  |
| obsarabidopsis#18551 | AT5G49450 | 6240911///835005 | NM_124322.3 | 1.082900047  |
| obsarabidopsis#18577 | AT5G50020 | 835066           | NM_124381.3 | 3.763700008  |
| obsarabidopsis#18696 | AT5G52620 | 835339           | NM_124640.1 | 2.028899908  |
| obsarabidopsis#18855 | AT5G56470 | 835748           | NM_125030.1 | 1.137500048  |
| obsarabidopsis#18860 | AGP14     | 835755           | NM_125037.2 | 0.245900005  |
| obsarabidopsis#18868 | AT5G56700 | 835771           | NM_125053.2 | 0.873899996  |
| obsarabidopsis#18900 | XRCC3     | 835850           | NM_125127.2 | 0.276300013  |
| obsarabidopsis#18924 | AT5G58040 | 835916           | NM_125189.2 | -0.2086      |
| obsarabidopsis#18964 | AT5G59230 |                  | NM_125313.1 | 1.588799953  |
| obsarabidopsis#18978 | SRR1      | 836075           | NM_125348.3 | 2.652100086  |
| obsarabidopsis#18982 | VIP2      | 836092           | NM_125363.1 | 0.837400019  |
| obsarabidopsis#19012 | AT5G60380 |                  | NM_125431.1 | -0.454899997 |
| obsarabidopsis#19176 | ANAC103   |                  | NM_125802.1 | 1.588799953  |
| obsarabidopsis#19187 | AT5G64420 | 836563           | NM_125838.2 | 0.358200014  |
| obsarabidopsis#19267 | AT5G66650 | 836797           | NM_126063.2 | -0.313899994 |
| obsarabidopsis#19320 | AT4G09500 | 826534           | NM_117018.3 | 0.090000004  |
| obsarabidopsis#19384 | AT3G26860 | 822302           | NM_113598.1 | 0.164900005  |
| obsarabidopsis#19661 | AT2G05000 | ---              | NM_126532.1 | 1.605399966  |
| obsarabidopsis#19708 | AT1G44222 | 5007775          | NM_103543.2 | 2.078000069  |
| obsarabidopsis#19795 | AT4G39630 | 830117           | NM_120123.1 | 0.121699996  |
| obsarabidopsis#19831 | AT3G14770 | 820705           | NM_112338.3 | 0.837400019  |
| obsarabidopsis#19976 | AT3G33073 | ---              | NM_114068.1 | 0.416599989  |
| obsarabidopsis#19982 | AT2G35585 | 818124           | NM_129111.2 | 1.064700007  |
| obsarabidopsis#19987 |           |                  | AC005698.1  | 1.567399979  |
| obsarabidopsis#20057 | AT5G46295 | 834672           | NM_123999.1 | 3.409600019  |
| obsarabidopsis#20087 | AT3G12300 | 820410           | NM_112066.3 | 6.687900066  |

|                      |           |                 |             |              |
|----------------------|-----------|-----------------|-------------|--------------|
| obsarabidopsis#20137 | AT4G22214 |                 | NM_118345.3 | 6.878399849  |
| obsarabidopsis#20192 | AT2G06255 | 815182          | NM_126634.2 | 2.139400005  |
| obsarabidopsis#20316 | AT3G54000 | 824567          | NM_115260.2 | 0.650600016  |
| obsarabidopsis#20382 | AT1G54923 | ---             | NM_104364.1 | 2.109499931  |
| obsarabidopsis#20443 |           |                 | AC007183.4  | 3.597199917  |
| obsarabidopsis#20591 | AT2G02620 | 814791          | NM_126317.2 | -0.105300002 |
| obsarabidopsis#20611 | AT2G03180 | 814847          | NM_126369.1 | -1.146600008 |
| obsarabidopsis#20784 | AT2G13630 | 815848          | NM_126942.1 | 0.940199971  |
| obsarabidopsis#20808 | AT2G14560 | 815943          | NM_127019.4 | 4.313700199  |
| obsarabidopsis#20890 | AT2G16650 | 816166///836164 | NM_127217.3 | 1.680299997  |
| obsarabidopsis#21075 | AT2G21340 | 816673          | NM_127706.3 | 0.496899992  |
| obsarabidopsis#21099 | AT2G21990 | 816735          | NM_127768.2 | 2.21690011   |
| obsarabidopsis#21352 | AT2G28330 | 817380          | NM_128392.3 | 1.064700007  |
| obsarabidopsis#21413 | AT2G30270 | 817577          | NM_128580.3 | 5.208099842  |
| obsarabidopsis#21491 | AT2G32100 | 817770          | NM_128770.2 | -0.802600026 |
| obsarabidopsis#21508 | AT2G32470 | 817808          | NM_128806.1 | 1.610000014  |
| obsarabidopsis#21651 | AT2G35750 | 818147          | NM_129133.1 | -0.106299996 |
| obsarabidopsis#21658 | AT2G35860 | 818159          | NM_179922.1 | 3.286600113  |
| obsarabidopsis#21780 | AT2G38630 |                 | NM_129420.2 | 4.183000088  |
| obsarabidopsis#21839 | RCA       | 818558          | NM_129531.2 | 9.26720047   |
| obsarabidopsis#21896 | AT2G41020 | 818702          | BT012041.1  | 0.038699999  |
| obsarabidopsis#21932 | AT2G41800 | 818779          | NM_129744.3 | 0.090000004  |
| obsarabidopsis#22416 | AT5G06630 | 830551          | NM_120746.2 | -0.282900006 |
| obsarabidopsis#22492 | AT-P4H-2  | 819804          | NM_111505.2 | 1.301800013  |
| obsarabidopsis#22587 | AT3G08620 | 820009          | NM_111696.2 | 1.442299962  |
| obsarabidopsis#22614 | AT3G09140 | 820068          | NM_111749.2 | 8.896100044  |
| obsarabidopsis#22627 | AT3G09430 | 820101          | NM_111777.1 | 0.0579       |
| obsarabidopsis#22755 | AT3G12180 | 820395          | NM_112053.3 | 2.710000038  |
| obsarabidopsis#22764 | AT3G12430 |                 | NM_112078.1 | 1.894500017  |
| obsarabidopsis#22782 | AT3G12710 | 820453          | NM_112107.2 | 3.004199982  |
| obsarabidopsis#22828 | AT3G13370 | 820537          | NM_112182.1 | -0.923500001 |
| obsarabidopsis#22866 | AT3G14120 | 820629          | NM_112268.2 | 3.119899988  |
| obsarabidopsis#22879 | AT3G14340 | 820654          | NM_112292.1 | 1.137500048  |
| obsarabidopsis#22903 | AT3G14860 | 820715          | NM_112348.3 | 0.81190002   |
| obsarabidopsis#22928 | AT3G15330 |                 | NM_112396.1 | 0.064300001  |
| obsarabidopsis#23112 | AT3G18540 | 821385          | NM_112740.1 | 0.677900016  |
| obsarabidopsis#23352 | AT3G22520 | 821823          | NM_113151.3 | 1.919399977  |
| obsarabidopsis#23410 | PHO1      | 821924          | NM_113246.3 | 1.835399985  |
| obsarabidopsis#23528 | AT3G26050 | 822202          | NM_113509.2 | 2.715500116  |
| obsarabidopsis#23596 | AT3G27480 |                 | NM_113664.1 | -2.800199986 |
| obsarabidopsis#23606 | AT3G27610 | 822383          | NM_113677.3 | 2.28399992   |
| obsarabidopsis#23720 | RALFL27   | 822684          | NM_113904.2 | 0.889199972  |
| obsarabidopsis#23808 | AT3G43490 |                 | NM_114217.1 | 0.1149       |
| obsarabidopsis#23818 | AT3G43870 |                 | NM_114255.1 | 1.480999947  |

|                      |           |        |             |             |
|----------------------|-----------|--------|-------------|-------------|
| obsarabidopsis#23844 | AT3G47100 | 823863 | NM_114577.2 | 3.117899895 |
| obsarabidopsis#23904 | AT3G52230 | 824388 | NM_115083.1 | 2.430299997 |
| obsarabidopsis#23920 | AT3G52620 | 824428 | NM_115122.1 | 0.88410002  |
| obsarabidopsis#23933 | AT3G53370 | 824505 | NM_115197.2 | 3.185499907 |
| obsarabidopsis#24027 | AT4G01340 | 828062 | NM_116364.1 | 22.63269997 |
| obsarabidopsis#24168 | AT4G09850 | 826574 | NM_117053.1 | 0.623099983 |
| obsarabidopsis#24182 | AT4G10740 |        | NM_117142.1 | 1.502900004 |
| obsarabidopsis#24222 | AT4G14050 | 827041 | NM_117480.3 | 0.0098      |
| obsarabidopsis#24394 | AT4G20220 | 827769 | NM_118141.1 | 3.760900021 |
| obsarabidopsis#24608 | AT4G39190 | 830074 | NM_120079.1 | 1.424700022 |
| obsarabidopsis#24613 | AT4G39420 | 830097 | NM_120102.1 | 0.532800019 |
| obsarabidopsis#24620 | AT5G01075 | 831885 | NM_120185.2 | 0.153200001 |

| <b>Treated</b> | <b>Factor</b> |
|----------------|---------------|
| -2.847800016   | 0.119501457   |
| -2.73939991    | 0.072821081   |
| -4.045000076   | 0.071714073   |
| -6.670199871   | 0.078411013   |
| -3.303499937   | 0.122852586   |
| -6.535999775   | 0.029650496   |
| -3.399300098   | 0.081644528   |
| -1.934700012   | 0.118898295   |
| -3.058300018   | 0.073033385   |
| -3.269500017   | 0.057400223   |
| -2.823400021   | 0.085064441   |
| -8.442299843   | 0.009754611   |
| -3.566900015   | 0.077299349   |
| -3.150300026   | 0.078367539   |
| -2.324199915   | 0.000647335   |
| -2.679800034   | 0.123595662   |
| -2.20510006    | 0.106041439   |
| -3.844899893   | 0.100439601   |
| 12.97469997    | 0.064017057   |
| -2.252399921   | 0.072947383   |
| -3.480000019   | 0.039973836   |
| -3.167900085   | 0.086803667   |
| 6.124499798    | 0.075546041   |
| -2.157999992   | 0.107209161   |
| -0.572399974   | 0.065086395   |
| -5.590199947   | 0.019678989   |
| -3.311300039   | 0.090590276   |
| -1.870100021   | 0.022935083   |
| -3.353699923   | 0.04446457    |
| -3.751100063   | 0.061324187   |
| -4.128200054   | 0.059296876   |
| -4.540800095   | 0.031367183   |
| -3.927099943   | 0.045505986   |
| -1.52489996    | 0.122614369   |
| -2.499700069   | 0.1025998     |
| -2.769399881   | 0.089225516   |
| -3.411499977   | 0.079505578   |
| -1.977900028   | 0.108059652   |
| 1.49940002     | 5.91362E-05   |
| -3.586199999   | 0.108766034   |
| -4.045000076   | 0.058197457   |
| -0.988399982   | 0.012694085   |
| -1.415599942   | 0.027586378   |

|              |             |
|--------------|-------------|
| 0.074199997  | 0.104378745 |
| -3.400000095 | 0.124714389 |
| -5.208199978 | 0.038630925 |
| -1.765699983 | 0.097767599 |
| -3.514800072 | 0.080086336 |
| 6.549600124  | 0.102450565 |
| -3.507800102 | 0.042750936 |
| -3.014199972 | 0.121320911 |
| -2.576699972 | 0.117619567 |
| 11.03610039  | 0.082246609 |
| -2.17750001  | 0.077999033 |
| 5.706299782  | 0.072197832 |
| 1.940299988  | 0.087225862 |
| -3.749599934 | 0.053742226 |
| -1.398300052 | 3.42081E-05 |
| -2.997400045 | 0.082126983 |
| -3.690000057 | 0.099001899 |
| -3.088900089 | 0.104835548 |
| -3.884599924 | 0.037891023 |
| -4.256299973 | 0.104596019 |
| -3.014199972 | 0.106623702 |
| -2.00909996  | 0.091753058 |
| -4.509399891 | 0.106882684 |
| -1.549800038 | 0.052705593 |
| -3.268199921 | 0.089411244 |
| -2.551500082 | 0.077885568 |
| -2.113899946 | 0.033859391 |
| -4.72660017  | 0.024060324 |
| -3.445600033 | 0.055838343 |
| -2.499700069 | 0.119302809 |
| -2.711899996 | 0.085418954 |
| 5.204599857  | 0.066957988 |
| -0.544499993 | 0.069888555 |
| -2.392100096 | 0.093655005 |
| -2.577199936 | 0.117578812 |
| -3.150300026 | 0.116153128 |
| -3.035900116 | 0.100676574 |
| -0.433099985 | 0.09318877  |
| -5.217599869 | 0.037985694 |
| -5.028299809 | 0.026396679 |
| -3.565500021 | 0.082979575 |
| -2.648400068 | 0.04020169  |
| -1.544100046 | 0.112336606 |
| -4.537000179 | 0.04860336  |



|              |             |
|--------------|-------------|
| -2.439699888 | 0.124369107 |
| -3.32249999  | 0.058004159 |
| -2.418600082 | 0.094130091 |
| -3.131000042 | 0.109173901 |
| -4.044099808 | 0.120457843 |
| -2.639800072 | 0.115510814 |
| -0.460599989 | 0.121927895 |
| -0.951300025 | 0.110131562 |
| -1.980000019 | 0.062569357 |
| -2.657599926 | 0.098591015 |
| -4.531300068 | 0.117660336 |
| -1.388800025 | 0.107008696 |
| -3.445600033 | 0.108653009 |
| -1.471500039 | 0.105352752 |
| -1.235900044 | 0.096294686 |
| -2.909499884 | 0.104255848 |
| -2.960000038 | 0.113110118 |
| 3.969500065  | 0.016211936 |
| -3.586199999 | 0.123732813 |
| 6.020800114  | 0.077756129 |
| -3.088900089 | 0.12186873  |
| -3.017199993 | 0.120249256 |
| -3.884599924 | 0.085697681 |
| -2.067199945 | 0.101573795 |
| -3.411499977 | 0.121278852 |
| -0.203500003 | 0.058936283 |
| -4.21449995  | 0.03205293  |
| -4.821000099 | 0.078378409 |
| 1.077700019  | 0.01913026  |
| -4.256299973 | 0.055260792 |
| -1.435199976 | 0.081333876 |
| 6.590000153  | 0.083481461 |
| -2.300400019 | 0.100418717 |
| -2.104300022 | 0.070982143 |
| 1.55219996   | 0.081283137 |
| -2.089799881 | 0.10502468  |
| -1.131600022 | 5.89643E-05 |
| -2.181699991 | 0.12053299  |
| -4.39139986  | 0.026190732 |
| -3.681200027 | 0.112836048 |
| -3.807199955 | 0.106159113 |
| 1.767799973  | 0.047954161 |
| -2.551500082 | 0.11735896  |
| -3.657700062 | 0.123074166 |

|              |             |
|--------------|-------------|
| 0.015        | 0.046520159 |
| -4.213600159 | 0.086966269 |
| -1.670899987 | 0.04167714  |
| -3.028000116 | 0.03125     |
| -1.041399956 | 0.123612799 |
| -3.784300089 | 0.049466651 |
| 0.157000005  | 0.039549407 |
| -3.265599966 | 0.104487337 |
| -3.657700062 | 0.04129469  |
| -3.956599951 | 0.109120943 |
| -4.778600216 | 0.092282429 |
| -4.39139986  | 0.119609192 |
| -1.664499998 | 0.049679704 |
| 8.24339962   | 0.117717415 |
| -2.690599918 | 0.083928242 |
| -3.691499949 | 0.051545851 |
| -0.455599993 | 0.043679509 |
| -2.711899996 | 0.066022433 |
| 0.918200016  | 0.072700046 |
| -0.015       | 0.008458985 |
| -0.943300009 | 0.05339691  |
| -2.687400103 | 0.118003368 |
| -3.596899986 | 0.088966124 |
| -3.129100084 | 0.00738749  |
| -3.479300022 | 0.08807034  |
| -3.598400116 | 0.048344646 |
| -6.762800217 | 0.010281537 |
| -2.171900034 | 0.085852258 |
| -0.646399975 | 0.098331675 |
| 17.36030006  | 0.111074485 |
| -8.669099808 | 0.002768845 |
| -1.939900041 | 0.099283643 |
| -2.423599958 | 0.120399386 |
| -0.0458      | 0.075724296 |
| 2.655299902  | 0.11836379  |
| 0.836399972  | 0.003834356 |
| -0.674600005 | 0.114895947 |
| -3.383100033 | 0.093376286 |
| -3.069299936 | 0.080386668 |
| -2.551500082 | 0.112321012 |
| -3.411499977 | 0.101096153 |
| 7.276599884  | 0.06756407  |
| -4.301300049 | 0.057165943 |
| -1.605700016 | 0.078443624 |

|              |             |
|--------------|-------------|
| -5.217599869 | 0.051567286 |
| -6.323800087 | 0.026984973 |
| -2.721299887 | 0.116386861 |
| -4.301300049 | 0.066228688 |
| -1.766499996 | 0.108818814 |
| -2.823400021 | 0.095325105 |
| -2.496099949 | 0.099201113 |
| -4.151000023 | 0.009114    |
| -3.667999983 | 0.056637451 |
| 0.761799991  | 0.019085225 |
| -2.499700069 | 0.019668078 |
| -5.75880003  | 0.011404129 |
| -3.795000076 | 0.051456604 |
| -0.90259999  | 0.000176542 |
| -1.705000043 | 0.05852513  |
| -3.769200087 | 0.040313315 |
| -2.52760005  | 0.123870097 |
| -2.000299931 | 0.104198039 |
| -2.423599958 | 0.102450579 |
| -1.817499995 | 0.0434229   |
| -4.999599934 | 0.039824501 |
| -1.119099975 | 0.1085025   |
| -4.587999821 | 0.123621382 |
| -8.442299843 | 0.003950909 |
| -2.634500027 | 0.115254901 |
| -1.463999987 | 0.117025927 |
| -0.983500004 | 0.032153063 |
| -1.962100029 | 0.104966447 |
| -3.079099894 | 0.097801484 |
| 1.360000014  | 0.073144853 |
| -2.252399921 | 0.09974581  |
| -0.983200014 | 0.031449918 |
| -0.85650003  | 0.043206736 |
| -3.333800077 | 0.091157168 |
| -2.089799881 | 0.099511012 |
| -2.451800108 | 0.122665361 |
| -2.881099939 | 0.099104896 |
| -1.745599985 | 0.075013809 |
| -1.452800035 | 0.062851891 |
| -4.346000195 | 0.092199311 |
| -2.252399921 | 0.075839855 |
| 8.269399643  | 0.103708021 |
| 4.658899784  | 0.000519856 |
| -3.657700062 | 0.023149103 |

|              |             |
|--------------|-------------|
| -2.911299944 | 0.107484467 |
| -2.880599976 | 0.050272029 |
| 2.364300013  | 2.85264E-07 |
| -2.510499954 | 0.116871908 |
| -4.778600216 | 0.042101044 |
| -6.670199871 | 0.023902416 |
| -1.342499971 | 0.067911521 |
| -1.978299975 | 0.117310174 |
| -5.159399986 | 0.09541104  |
| -4.437300205 | 0.053738493 |
| -4.317299843 | 0.068935938 |
| -1.600200057 | 0.096361451 |
| 6.104199886  | 0.097348318 |
| 2.045599937  | 0.024022    |
| -0.999800026 | 0.107865103 |
| 0.113899998  | 0.006994323 |
| -3.844899893 | 0.112851694 |
| -3.088900089 | 0.110444993 |
| -4.309299946 | 0.051854029 |
| -3.156599998 | 0.087814324 |
| -3.505700111 | 0.068303339 |
| -4.936399937 | 0.054723337 |
| -2.525500059 | 0.11718826  |
| -2.049599886 | 0.113542162 |
| -4.416999817 | 0.0581894   |
| 4.675199986  | 0.021886725 |
| -0.045299999 | 0.040076494 |
| 7.31580019   | 0.070443004 |
| -1.490300059 | 1.2115E-07  |
| -3.072999954 | 0.084875971 |
| -0.118000001 | 6.39156E-06 |
| -5.168700218 | 0.111059122 |
| -0.439099997 | 0.097415827 |
| -1.440099955 | 0.115582913 |
| 4.239099979  | 0.103729621 |
| -0.169400007 | 0.017882593 |
| -1.049000025 | 0.123193674 |
| -2.846699953 | 0.113944247 |
| -4.170599937 | 0.090045638 |
| -1.319100022 | 0.115462795 |
| -4.044099808 | 0.084805414 |
| -1.850200057 | 0.102436379 |
| -3.694499969 | 0.074201904 |
| 0.173199996  | 0.00052148  |

|              |             |
|--------------|-------------|
| -3.502899885 | 0.118486948 |
| -3.7421      | 0.053485811 |
| -1.978299975 | 0.113463491 |
| -6.562399864 | 0.03906716  |
| -4.090499878 | 0.118191645 |
| -5.562699795 | 0.02959916  |
| -2.525500059 | 0.097199991 |
| -3.162899971 | 0.116831392 |
| -2.971199989 | 0.113746963 |
| -0.644699991 | 7.91176E-07 |
| 0.015        | 0.007328329 |
| -2.534300089 | 0.079792656 |
| -6.458000183 | 0.072947375 |
| -0.466899991 | 0.118191645 |
| -3.749599934 | 0.09986341  |
| 3.310600042  | 0.062033858 |
| -2.490999937 | 0.08361467  |
| -3.449700117 | 0.084120415 |
| -3.028000116 | 0.057875641 |
| 0.200399995  | 0.084594041 |
| -2.126199961 | 0.056129389 |
| -1.870100021 | 0.124343239 |
| -3.158499956 | 0.094443813 |
| -3.786600113 | 0.039541185 |
| -3.90260005  | 0.055211008 |
| -3.21420002  | 0.124515742 |
| -1.714699984 | 0.101285532 |
| -0.479099989 | 0.114133954 |
| -2.604099989 | 0.092046075 |
| -4.128200054 | 0.078383833 |
| -1.428900003 | 0.123475783 |
| -3.13470006  | 0.088824399 |
| -4.627999783 | 0.050272048 |
| -4.727600098 | 0.03546156  |
| -3.585500002 | 0.074304834 |
| -2.022399902 | 0.08089532  |
| -1.183899999 | 0.104248613 |
| -3.311300039 | 0.092589982 |
| -2.795200109 | 0.080626614 |
| -3.769200087 | 0.054947585 |
| -2.144200087 | 0.108149581 |
| -2.000299931 | 0.084336452 |
| 0.241099998  | 0.111220919 |
| 0.287600011  | 0.011839073 |

|              |             |
|--------------|-------------|
| 3.84980011   | 0.12254642  |
| -1.166700006 | 0.101103164 |
| -3.21420002  | 0.068640314 |
| -0.967400014 | 0.118511587 |
| 0.081699997  | 0.087443814 |
| -3.445600033 | 0.098734625 |
| -6.762800217 | 0.020387089 |
| -2.848400116 | 0.072363198 |
| 1.287199974  | 0.122724891 |
| -1.725299954 | 0.094365276 |
| -3.119800091 | 0.08152011  |
| -1.049999952 | 0.103887931 |
| -2.029500008 | 0.117098935 |
| 1.292199969  | 0.06625165  |
| -4.778600216 | 0.063548401 |
| -1.55250001  | 0.111684442 |
| -3.932699919 | 0.070491843 |
| -0.239700004 | 0.086791635 |
| -0.621399999 | 0.035787512 |
| 6.0072999    | 0.104393184 |
| -3.479300022 | 0.087292403 |
| -3.120399952 | 0.108037204 |
| -3.963799953 | 0.07797201  |
| -2.463500023 | 0.073541373 |
| -1.807500005 | 0.105126627 |
| -0.070299998 | 0.001999146 |
| -3.04369998  | 0.116499856 |
| -4.21449995  | 0.008232236 |
| -2.158499956 | 0.060245614 |
| -0.1699      | 0.110790037 |
| -4.346000195 | 0.093266308 |
| -0.93720001  | 0.06007465  |
| -2.324199915 | 0.090766266 |
| -2.781100035 | 0.082870364 |
| -3.072999954 | 0.113652393 |
| -2.604099989 | 0.102806255 |
| -1.081200004 | 0.12494804  |
| -1.243999958 | 0.118306391 |
| -0.77759999  | 0.088812083 |
| -7.461400032 | 0.039522003 |
| -1.098899961 | 0.09586183  |
| -2.938800097 | 0.070413701 |
| -3.411499977 | 0.086785622 |
| -3.480000019 | 0.032106295 |

|              |             |
|--------------|-------------|
| -0.073700003 | 0.109454274 |
| -1.253399968 | 0.077820815 |
| -2.767199993 | 0.079588294 |
| 0.1664       | 0.123356022 |
| -0.879599988 | 8.35781E-08 |
| -3.00880003  | 0.080665745 |
| -4.632900238 | 0.014221325 |
| -3.150300026 | 0.111870378 |
| 0.760599971  | 0.124974012 |
| -1.725299954 | 0.112656303 |
| -3.657700062 | 0.054768864 |
| -2.909499884 | 0.119683832 |

**Gene Description**

unknown protein

unknown protein

polygalacturonase

BXL2 (BETA-XYLOSIDASE 2)

PGA4 (POLYGALACTURONASE 4)

ATCEL2

catalytic/ protein phosphatase type 2C

transferase, transferring glycosyl groups / transferase, transferring hexosyl groups

EMB2284

carbohydrate transporter/ sugar porter

ATRBOHB

unknown protein

carboxylic ester hydrolase/ hydrolase, acting on ester bonds

G6PD4

unknown protein

inositol or phosphatidylinositol kinase/ phosphotransferase, alcohol group as acceptor

unknown protein

RDR1 (RNA-DEPENDENT RNA POLYMERASE 1)

LHCB6

DNA binding / transcription factor

DNA binding / transcription factor

unknown protein

GGT1 (ALANINE-2-OXOGLUTARATE AMINOTRANSFERASE 1)

unknown protein

DNA binding / transcription factor

unknown protein

carboxylic ester hydrolase/ hydrolase, acting on ester bonds

kinase

peptidase/ transcription factor

UFO (UNUSUAL FLORAL ORGANS)

Arabidopsis thaliana chromosome 1 BAC F19C17 genomic sequence,complete sequence

nucleic acid binding / transcription factor/ zinc ion binding

VIIIA

4CL1 (4-COUMARATE:COA LIGASE 1)

unknown protein

ATP binding

ATP binding / GTP binding / GTPase

carboxylic ester hydrolase/ hydrolase, acting on ester bonds

transferase, transferring glycosyl groups / transferase, transferring hexosyl groups

unknown protein

serine-type endopeptidase inhibitor

NRPD1a

hydrolase, hydrolyzing O-glycosyl compounds



|                                                                                                                                |
|--------------------------------------------------------------------------------------------------------------------------------|
| alcohol dehydrogenase/ cinnamyl-alcohol dehydrogenase                                                                          |
| AT-HSFA8                                                                                                                       |
| ATPIS1                                                                                                                         |
| ATPPC4                                                                                                                         |
| ATP binding / transmembrane receptor                                                                                           |
| S-adenosylmethionine-dependent methyltransferase/ methyltransferase/ phosphoethanolamine N-methyltransferase                   |
| acyltransferase/ carboxylic ester hydrolase/ lipase                                                                            |
| EXL6                                                                                                                           |
| 1-aminocyclopropane-1-carboxylate synthase/ transaminase/ transferase, transferring nitrogenous groups                         |
| unknown protein                                                                                                                |
| TMM (TOO MANY MOUTHS)                                                                                                          |
| sulfate transporter                                                                                                            |
| ARPN (PLANTACYANIN)                                                                                                            |
| CDC48B                                                                                                                         |
| nucleotidyltransferase                                                                                                         |
| Arabidopsis thaliana chromosome 2 clone T6P5 map mi310, complete sequence                                                      |
| Arabidopsis thaliana chromosome 2 clone F18P14 map ve013, complete sequence                                                    |
| ATP binding / DNA binding / DNA-dependent ATPase                                                                               |
| unknown protein                                                                                                                |
| Arabidopsis thaliana chromosome 2 clone T26I20 map mi398, complete sequence                                                    |
| Arabidopsis thaliana chromosome 2 clone F7H1 map mi398, complete sequence                                                      |
| HB-2                                                                                                                           |
| PDE319                                                                                                                         |
| DNA binding / transcription factor                                                                                             |
| CESA10 (CELLULASE SYNTHASE 10)                                                                                                 |
| nucleic acid binding / transcription factor/ zinc ion binding                                                                  |
| PAG1                                                                                                                           |
| ATP binding / kinase/ protein serine/threonine kinase                                                                          |
| transcription factor                                                                                                           |
| RNA binding                                                                                                                    |
| water channel                                                                                                                  |
| unknown protein                                                                                                                |
| ATERF15                                                                                                                        |
| cysteine-type endopeptidase/ cysteine-type peptidase                                                                           |
| oxidoreductase, acting on paired donors, with incorporation or reduction of molecular oxygen, 2-oxoglutarate as one donor, and |
| DNA binding / transcription factor                                                                                             |
| peroxidase                                                                                                                     |
| LHCB4.3                                                                                                                        |
| carboxylic ester hydrolase/ hydrolase, acting on ester bonds                                                                   |
| ATP binding / kinase/ protein serine/threonine kinase                                                                          |
| ATP binding / kinase/ protein kinase/ protein serine/threonine kinase/ protein-tyrosine kinase                                 |
| nucleic acid binding / transcription factor/ zinc ion binding                                                                  |
| lyase/ pectate lyase                                                                                                           |
| translation initiation factor                                                                                                  |

metal ion binding

acyl-CoA oxidase

unknown protein

RGP3 (REVERSIBLY GLYCOSYLATED POLYPEPTIDE 3)

phosphoprotein phosphatase

carbohydrate transporter/ sugar porter/ transporter

unknown protein

UDP-glycosyltransferase/ sucrose synthase/ transferase, transferring glycosyl groups

ATHRS1 (HISTIDYL-TRNA SYNTHETASE 1)

enzyme inhibitor/ pectinesterase

ATATH5

heat shock protein binding / unfolded protein binding

OASC

hydrogen-exporting ATPase, phosphorylative mechanism

GLP10 (GERMIN-LIKE PROTEIN 10)

CRCK2

MSH6

calcium ion binding

kinase

hydrogen-transporting ATP synthase, rotational mechanism / hydrogen-transporting ATPase, rotational mechanism

clathrin binding

SCPL20

kinase/ protein binding

protein binding / transporter

transferase, transferring glycosyl groups / transferase, transferring hexosyl groups

ATP binding

unknown protein

lyase

kinase

SKS1 (SKU5 SIMILAR 1)

FEY (FOREVER YOUNG)

GAMMA-VPE

unknown protein

UGT76C1

unknown protein

protein binding / ubiquitin-protein ligase/ zinc ion binding

unknown protein

L-aspartate oxidase/ disulfide oxidoreductase/ oxidoreductase

PAM1 (PLANT ADHESION MOLECULE 1)

IPP1

UTP-glucose-1-phosphate uridylyltransferase/ nucleotidyltransferase

NIT4 (NITRILASE 4)

Arabidopsis thaliana DNA, chromosome 5 centromere region,clone:F22D12

ATP binding / protein binding / protein kinase/ protein serine/threonine kinase/ protein-tyrosine kinase

PDF1.2

polygalacturonase

peptidase/ subtilase

ATPase, coupled to transmembrane movement of substances

SAD1 (SUPERSENSITIVE TO ABA AND DROUGHT 1)

ATP binding / kinase/ protein kinase/ protein serine/threonine kinase/ protein-tyrosine kinase

unknown protein

unknown protein

ILL1

transcription factor/ zinc ion binding

UDP-glycosyltransferase/ transferase, transferring hexosyl groups

HSP18.2 (HEAT SHOCK PROTEIN 18.2)

carbohydrate transporter/ sugar porter

oxidoreductase

DNA binding / transcription factor

GRF4

RNA binding / structural constituent of ribosome

UDP-glycosyltransferase/ transferase, transferring hexosyl groups

nucleic acid binding / transcription factor/ zinc ion binding

unknown protein

calcium ion binding

structural constituent of cell wall

unknown protein

unknown protein

unknown protein

antiporter/ drug transporter/ transporter

unknown protein

protein binding

nucleic acid binding / transcription factor

rhodopsin-like receptor

enzyme inhibitor/ pectinesterase/ pectinesterase inhibitor

oligosaccharide transporter

unknown protein

unknown protein

calcium ion binding

WAKL5 (WALL ASSOCIATED KINASE-LIKE 5)

unknown protein

unknown protein

catalytic/ hydrolase

hydrolase

unknown protein

unknown protein

protein binding

EMB2204

unknown protein

hydrolase, hydrolyzing O-glycosyl compounds

nucleotide binding

ATP binding / DNA binding / nucleoside-triphosphatase/ nucleotide binding

DNA binding

unknown protein

unknown protein

unknown protein

unknown protein

carboxylic ester hydrolase/ hydrolase, acting on ester bonds

unknown protein

unknown protein

unknown protein

unknown protein

unknown protein

unknown protein

transcription factor

unknown protein

ZF14

nucleic acid binding

nucleotide binding

serine-type endopeptidase inhibitor

unknown protein

cysteine-type endopeptidase/ ubiquitin thiolesterase

unknown protein

unknown protein

unknown protein

unknown protein

WRKY36

unknown protein

NADK3

unknown protein

ATIPT8

CYP705A33

kinase

SCPL21

hydrolase, hydrolyzing O-glycosyl compounds

heme binding / iron ion binding / monooxygenase/ oxygen binding

ATP binding / DNA binding / DNA-dependent ATPase/ nucleoside-triphosphatase/ nucleotide binding

ubiquitin-protein ligase/ zinc ion binding

unknown protein

unknown protein

aspartic-type endopeptidase/ pepsin A

unknown protein

|                                                                                                                            |
|----------------------------------------------------------------------------------------------------------------------------|
| unknown protein                                                                                                            |
| bile acid:sodium symporter                                                                                                 |
| unknown protein                                                                                                            |
| O-methyltransferase/ S-adenosylmethionine-dependent methyltransferase                                                      |
| unknown protein                                                                                                            |
| protein binding / ubiquitin-protein ligase/ zinc ion binding                                                               |
| FAD binding / oxidoreductase                                                                                               |
| DNA binding                                                                                                                |
| unknown protein                                                                                                            |
| protein binding                                                                                                            |
| Arabidopsis thaliana DNA chromosome 4, contig fragment No. 19.                                                             |
| unknown protein                                                                                                            |
| ATP binding / transmembrane receptor                                                                                       |
| WRKY19                                                                                                                     |
| lipid binding                                                                                                              |
| unknown protein                                                                                                            |
| adenine phosphoribosyltransferase/ transferase                                                                             |
| endopeptidase Clp                                                                                                          |
| unknown protein                                                                                                            |
| binding                                                                                                                    |
| DNA binding / transcription factor                                                                                         |
| cinnamyl-alcohol dehydrogenase                                                                                             |
| unknown protein                                                                                                            |
| unknown protein                                                                                                            |
| (S)-coclaurine-N-methyltransferase/ S-adenosylmethionine-dependent methyltransferase/ cyclopropane-fatty-acyl-phospholipid |
| unknown protein                                                                                                            |
| catalytic/ hydrolase                                                                                                       |
| DNA binding / transcription factor                                                                                         |
| unknown protein                                                                                                            |
| receptor                                                                                                                   |
| kinase                                                                                                                     |
| unknown protein                                                                                                            |
| EIN2 (ETHYLENE INSENSITIVE 2)                                                                                              |
| unknown protein                                                                                                            |
| unknown protein                                                                                                            |
| nucleotide binding                                                                                                         |

KEA6

unknown protein

protein binding

unknown protein

structural constituent of ribosome

unknown protein

VAR1 (VARIEGATED 1)

unknown protein

unknown protein

DNA binding / transcription factor

metal ion binding

unknown protein

oxidoreductase

AGP14 (ARABINOGALACTAN PROTEIN 14)

unknown protein

XRCC3

unknown protein

unknown protein

SRR1 (SENSITIVITY TO RED LIGHT REDUCED 1)

VIP2

unknown protein

ANAC103

DNA binding / DNA-directed DNA polymerase

unknown protein

transferase, transferring glycosyl groups

unknown protein

Genomic sequence for Arabidopsis thaliana BAC T3P18 from Chromosome 1, complete sequence

unknown protein

unknown protein

unknown protein

unknown protein

unknown protein

unknown protein

Arabidopsis thaliana chromosome 1 BAC F9D18 sequence, complete sequence

protein binding / zinc ion binding

unknown protein

RCA (RUBISCO ACTIVASE)

protein binding

unknown protein

structural constituent of cell wall

AT-P4H-2

nucleic acid binding

unknown protein

unknown protein

unknown protein

3'-5' exonuclease/ nucleic acid binding

DNA-3-methyladenine glycosylase I

unknown protein

PHO1 (PHOSPHATE 1)

unknown protein

unknown protein

unknown protein

RALFL27 (RALF-LIKE 27)

nucleic acid binding

unknown protein

unknown protein

unknown protein

unknown protein

DNA binding

unknown protein





d incorporation of one atom each of oxygen into both donors







1 synthase
